# Supplementary material for: Citrate Accumulation-Related Gene Expression and/or Enzyme Activity Analysis Combined With Metabolomics Provide a Novel Insight for an Orange Mutant
Source: PubMed Central journal article supplement (PMC4935991; doi:10.1038/srep29343), 2016-07-07
Supplement: srep29343-s1.pdf [file srep29343-s1.pdf]

1 **Supplementary information**

2

3 **Citrate accumulation-related gene expression and/or enzyme activity analysis combined with**  
4 **metabolomics provide a novel insight for an orange mutant**

5 Authors:

6 Ling-Xia Guo#, Cai-Yun Shi#, Xiao Liu, Dong-Yuan Ning, Long-Fei Jing, Huan Yang, Yong-Zhong

7 Liu\*

8

9 Addresses:

10 Key Laboratory of Horticultural Plant Biology (Huazhong Agricultural University), Ministry of

11 Education, Wuhan 430070, P.R.China

12 College of Horticulture & Forestry Sciences, Huazhong Agricultural University, Wuhan 430070,

13 P.R.China

14

15 # LX Guo and CY Shi contribute equally to the paper.

16

17 Corresponding author: Yong-Zhong Liu

18 Tel: +86-27-87281897; Fax: +86-2787282010; e-mail address: [liuyongzhong@mail.hzau.edu.cn](mailto:liuyongzhong@mail.hzau.edu.cn)

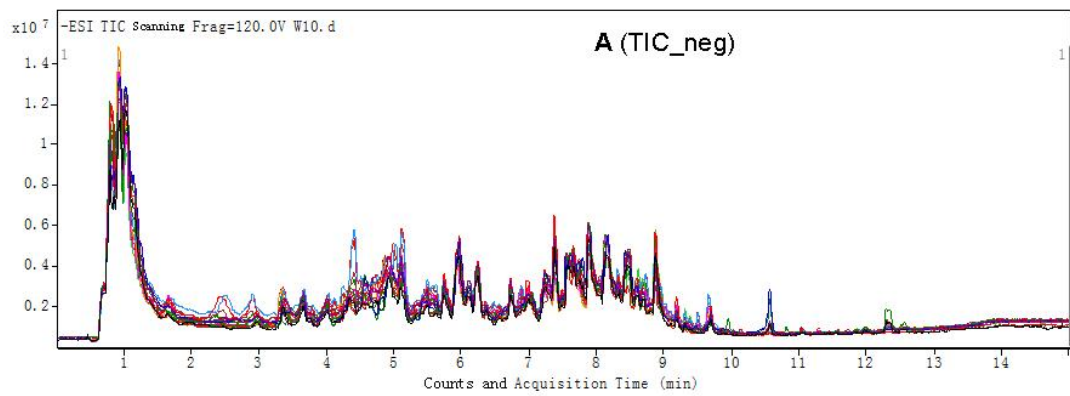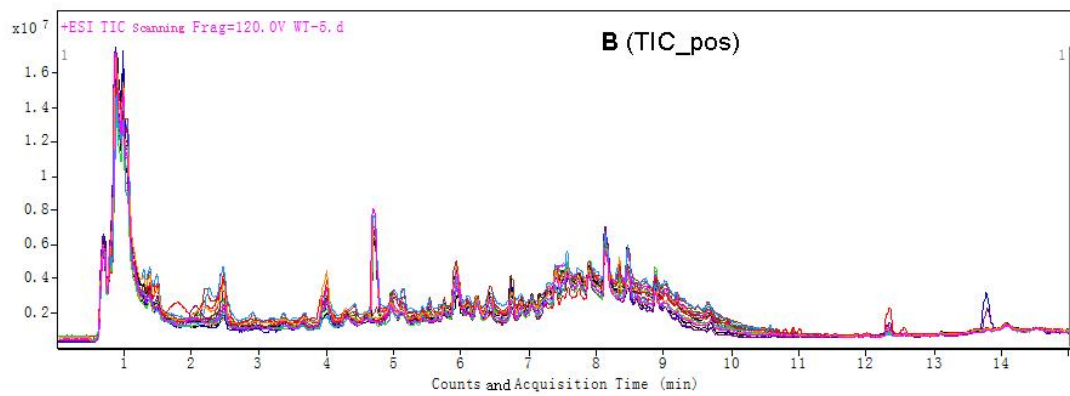

19

20 **Fig. s1** Overlap of the total iron current (TIC) chromatographs of all samples under negative

21 **mode (A) and positive mode (B)**

22

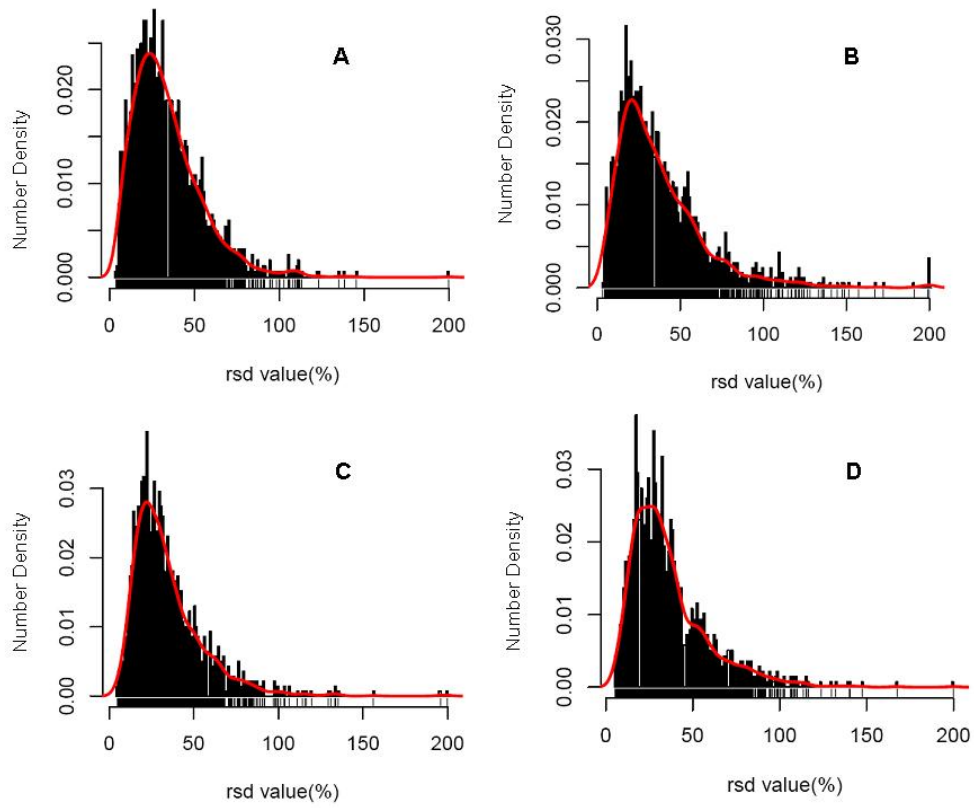

22

23 **Fig. s2 RSD (relative standard deviation) frequency distribution.** A refers to the RSD of group  
 24 'HAL' under positive mode. B refers to the RSD of group 'AL' under positive mode. C refers to the  
 25 RSD of group 'HAL' under negative mode. D refers to the RSD of group 'AL' under negative mode

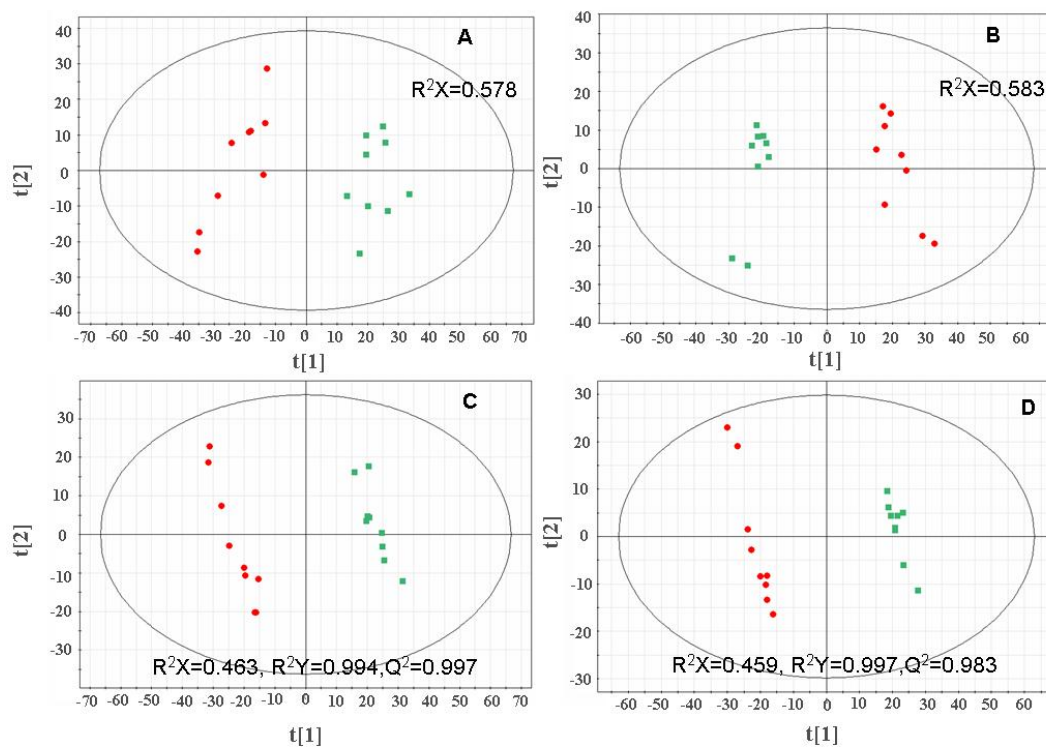

28

29

30 **Fig. s3 The unsupervised principal component analysis (PCA) and partial least squares**

31 **discriminant analysis (PLS-DA). A and C refer to the PCA and PLA-DA for positive mode,**

32 **respectively. B and D refer to PCA and PCA-DA for negative mode, respectively. The red dots refer to**

33 **the 'HAL' samples. The green squares refer to the 'AL' samples.  $R^2X$  refers to the sum of squares of**

34 **all the X's explained by the extracted components.  $R^2Y$  refers to the PLS sum of squares of the entire**

35 **Y's explained by the extracted components.  $Q^2(\text{Cum})$  refers to the cumulative cross validated  $R^2$ .**

36

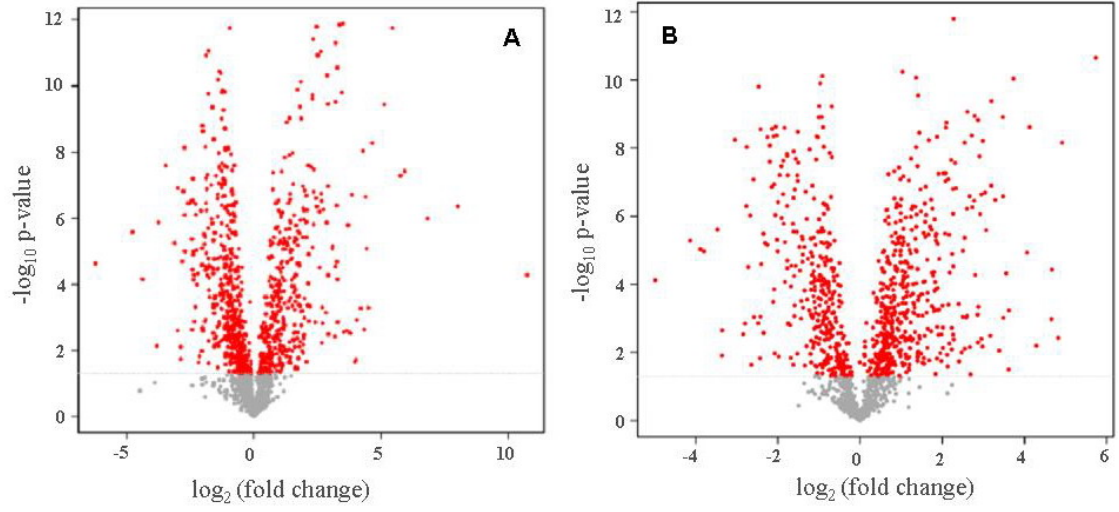

37

38 **Fig. s4** Volcano plot for positive mode (A) and negative mode (B). Variables in red are significant

39 at p-value < 0.05.

40

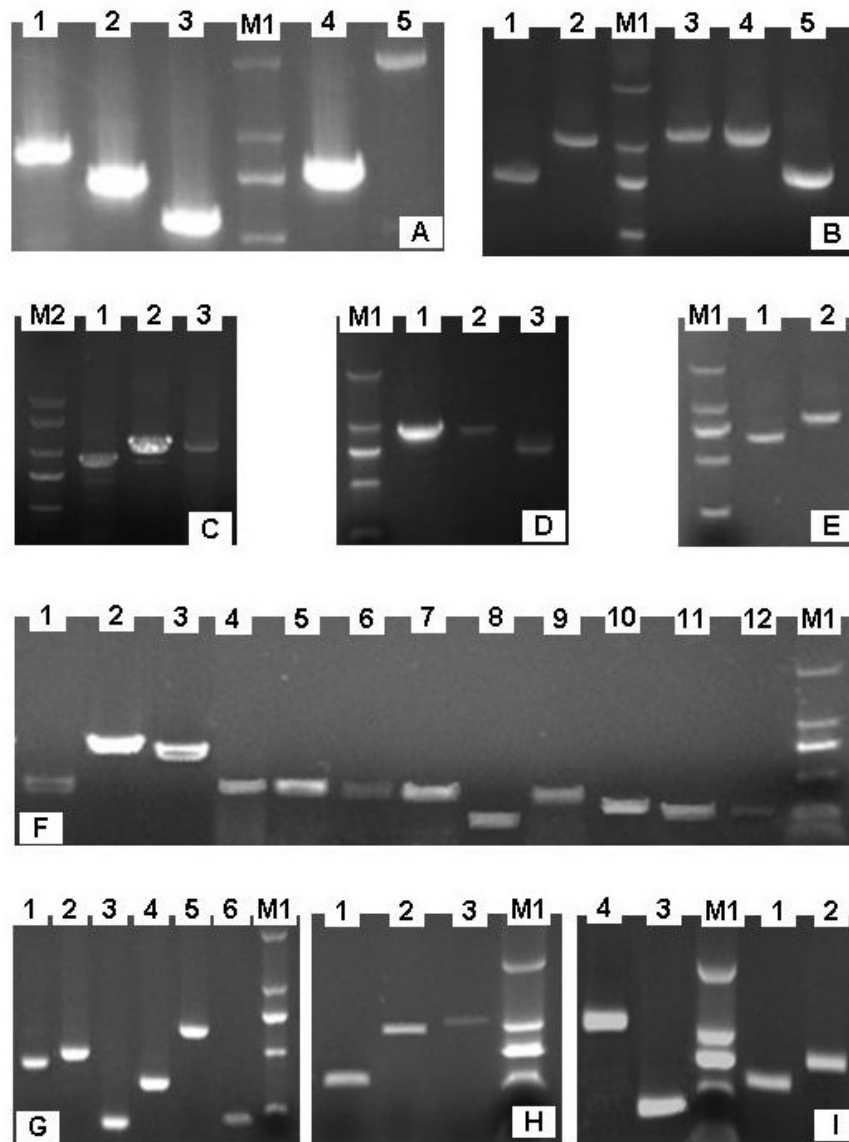

41

42 **Fig. s5 PCR amplification of genes involved in citrate synthesis, transport, or utilization.** A1,  
 43 A2, A3, A4 and A5 refer to *PECP1*, *PEPC2*, *PECP3*, *PEPCK1* and *PEPCK2*, respectively. B1, B2,  
 44 B3, B4, and B5 refer to *CS1*, *CS2*, *GS1*, *GS2*, and *GS3*, respectively. C1, C2, and C3 refer to  
 45 *NAD-IDH1*, *NAD-IDH2*, and *NAD-IDH3*, respectively. D1, D2, and D3 refer to *NADP-IDH1*,  
 46 *NADP-IDH2*, and *NADP-IDH3*, respectively. E1 and E2 refer to *FBPase1* and *FBPase2*, respectively.  
 47 F1 to F12 refer to *VHA-af*, *VHA-A*, *VHA-B*, *VHA-C*, *VHA-D*, *VHA-E1*, *VHA-E2*, *VHA-F1*, *VHA-F2*,  
 48 *VHA-G*, *VHA-H1*, and *VHA-H2*, respectively. G1 to G6 refer to *VHA-c1* to *VHA-c4*, *VHA-d* and *VHA-e*,  
 49 respectively. H1 to H3 refer to *VHA-a1*, *VHA-a2*, and *VHA-c''*, respectively. I1 to I4 refer to *VHP1* to  
 50 *VHP4*, respectively. M1 and M2 refer to the DL 2000 marker and DL2000 ZM404 (ZOMANBIO,  
 51 Beijing, China), respectively.

52

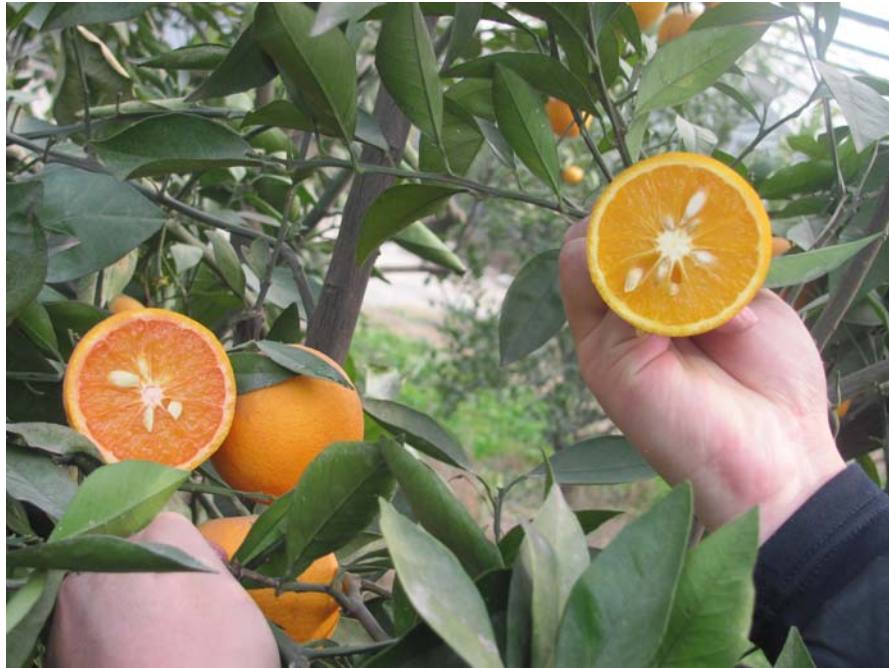

53

54 **Fig. s6 'Hong Anliu' and 'Anliu' grafted together on the same rootstock.** The base and middle  
55 rootstocks are trifoliate orange and Satsuma mandarin, respectively. The left cut fruit is 'Hong Anliu'  
56 and the right cut fruit is 'Anliu'.

Table s1 Significant difference in M/Z between 'HAL' (M) and 'AL' (W) under positive or negative mode

| Positive mode |            |         |             |                  | Negative mode |            |         |             |                  |
|---------------|------------|---------|-------------|------------------|---------------|------------|---------|-------------|------------------|
| M/Z           | RT         | VIP     | p-value     | Fold change(M/W) | M/Z           | RT         | VIP     | P-value     | Fold change(M/W) |
| 595.1648859   | 5.94294814 | 1.66967 | 1.78879E-12 | -0.942361935     | 100.0415049   | 1.40777129 | 1.47124 | 6.52951E-07 | 0.66072928       |
| 585.2158393   | 8.98078093 | 1.66888 | 1.63338E-12 | 2.471264291      | 104.0365584   | 0.77409569 | 1.21531 | 0.000484801 | 0.603294804      |
| 265.1533369   | 4.71429206 | 1.6659  | 1.78511E-12 | 5.44388615       | 111.0091768   | 1.02886032 | 1.56774 | 1.23296E-09 | -0.930769689     |
| 567.2050195   | 9.67054751 | 1.66555 | 1.42837E-12 | 3.369511474      | 115.0044136   | 0.92323607 | 1.15438 | 0.001273197 | 0.427008508      |
| 583.1785637   | 9.67247525 | 1.6653  | 1.32392E-12 | 3.50439548       | 117.0202874   | 1.08010082 | 1.03167 | 0.006975775 | 2.674859042      |
| 580.2596543   | 8.97170087 | 1.6648  | 3.91902E-12 | 2.343730984      | 117.0205069   | 1.4037916  | 1.29385 | 0.000168266 | 1.144104968      |
| 562.2496763   | 9.67312481 | 1.65964 | 5.10792E-12 | 3.236585539      | 118.0520887   | 0.78598986 | 1.17764 | 0.000940175 | 0.533464725      |
| 236.07788     | 0.7609576  | 1.65598 | 1.61194E-10 | 3.453994289      | 120.9969982   | 5.3542159  | 1.33914 | 4.30245E-05 | 0.59573233       |
| 545.2230025   | 8.97771538 | 1.65561 | 9.45269E-12 | 2.633312337      | 128.0363262   | 1.04459364 | 1.48361 | 3.35384E-07 | 3.290869336      |
| 492.1771765   | 7.38934663 | 1.65535 | 8.92435E-12 | -1.773703826     | 128.0363675   | 1.21993038 | 1.42509 | 3.50871E-06 | 2.171688562      |
| 149.0595194   | 4.72094502 | 1.65456 | 1.18858E-11 | 2.517268929      | 129.0204204   | 1.04457929 | 1.25736 | 0.000243697 | 0.561873087      |
| 967.3766417   | 7.39001093 | 1.65327 | 1.20404E-11 | -1.875512348     | 129.0205202   | 1.2690318  | 1.06644 | 0.00387133  | 0.637160233      |
| 1000.993109   | 9.67611082 | 1.65054 | 2.90174E-11 | 3.291749951      | 133.0149573   | 0.92493701 | 1.2407  | 0.000337948 | 0.405497992      |
| 1084.325955   | 9.67611082 | 1.64868 | 4.89628E-11 | 2.88642522       | 135.031583    | 0.80972715 | 1.27956 | 0.000147382 | 0.81017202       |
| 455.1918352   | 7.39235476 | 1.6474  | 4.24647E-11 | -1.290431167     | 142.0522528   | 1.41040584 | 1.46937 | 6.67733E-07 | 0.641980624      |
| 207.1378091   | 7.39240283 | 1.64735 | 3.7313E-11  | -1.3489589       | 147.0311802   | 1.41012412 | 1.06108 | 0.004132983 | 0.312527245      |
| 163.1102763   | 7.38973291 | 1.64436 | 6.53656E-11 | -1.409302621     | 153.0927456   | 7.39018894 | 1.47549 | 4.81201E-07 | -0.802612083     |
| 177.0544209   | 4.7144162  | 1.6419  | 7.6079E-11  | 1.845638578      | 153.0928068   | 9.02706801 | 1.08002 | 0.003130287 | 0.562551906      |
| 729.2582685   | 9.19021863 | 1.64093 | 3.77465E-10 | 5.128292282      | 154.0633584   | 0.75223705 | 1.19654 | 0.000689124 | 1.049542459      |
| 427.2011419   | 4.60659331 | 1.64072 | 1.29156E-10 | 1.721970118      | 155.0000978   | 0.98130641 | 1.55792 | 3.34494E-09 | -1.507665266     |
| 438.8957587   | 7.4965594  | 1.6394  | 2.45239E-10 | 2.309111018      | 155.0358456   | 2.44095831 | 1.29157 | 0.000117999 | 1.126791066      |
| 123.0802332   | 7.3924509  | 1.63877 | 1.55019E-10 | -1.143811663     | 158.0473669   | 0.82092357 | 1.05812 | 0.004752403 | 0.582138703      |
| 149.0957624   | 7.39341346 | 1.63706 | 1.3668E-10  | -1.218382807     | 158.97921     | 0.67567542 | 1.27234 | 0.000179381 | 0.329328935      |
| 173.0998195   | 7.7719487  | 1.6364  | 1.78625E-10 | -1.784916725     | 163.0161227   | 8.83216441 | 1.56052 | 2.37699E-09 | -2.046378848     |
| 495.1841116   | 7.39107239 | 1.63493 | 1.59185E-10 | -1.252332243     | 172.0987858   | 6.12529966 | 1.3778  | 1.58033E-05 | 0.666315825      |
| 559.14477     | 8.34626948 | 1.63449 | 1.97277E-10 | 2.312333755      | 174.0783085   | 1.33695718 | 1.32584 | 5.85748E-05 | 1.155753975      |
| 565.1558847   | 7.21514362 | 1.62997 | 4.50231E-10 | -1.628360375     | 174.9569376   | 0.66819347 | 1.08451 | 0.003856532 | -0.416893591     |
| 483.1839565   | 7.31749063 | 1.62986 | 3.06902E-10 | 3.233952629      | 175.0255939   | 0.93330432 | 1.43234 | 4.39079E-06 | 0.923949239      |
| 393.1031647   | 9.67423282 | 1.62933 | 3.6195E-10  | 2.920705018      | 175.0621408   | 4.69766727 | 1.3082  | 8.64235E-05 | 1.828175117      |
| 473.2026993   | 7.39070612 | 1.62668 | 5.30577E-10 | -1.189054206     | 183.1038027   | 7.98393418 | 1.26877 | 0.000212138 | 0.829065656      |
| 711.2552269   | 7.96620194 | 1.62658 | 9.84177E-10 | 1.866916884      | 186.0425165   | 1.41141832 | 1.48017 | 4.32855E-07 | 0.903881883      |
| 266.1021029   | 6.65537203 | 1.62643 | 4.31474E-10 | 1.813821316      | 187.0270105   | 1.40687875 | 1.41526 | 6.20289E-06 | 0.962259708      |
| 543.1320318   | 0.91340999 | 1.62369 | 1.27951E-09 | 1.299566306      | 187.0987954   | 8.33957251 | 1.36432 | 2.1483E-05  | 1.11386618       |
| 248.1120105   | 4.7247773  | 1.6209  | 9.59998E-10 | 1.401971362      | 190.0555094   | 3.72986689 | 1.09478 | 0.002995976 | 0.731520517      |
| 692.2189566   | 7.52355511 | 1.6188  | 2.3419E-09  | -2.00024577      | 191.0213534   | 1.02860441 | 1.55251 | 4.80444E-09 | -1.022598924     |



|             |            |         |             |              |             |            |         |             |              |
|-------------|------------|---------|-------------|--------------|-------------|------------|---------|-------------|--------------|
| 511.1574119 | 7.39240283 | 1.61876 | 9.90357E-10 | -1.251194699 | 192.0833815 | 1.02781278 | 1.5602  | 2.55463E-09 | -1.831680069 |
| 191.1060921 | 7.77744386 | 1.61592 | 1.68228E-09 | -2.019386459 | 194.0830089 | 11.5863511 | 1.04319 | 0.004756682 | 0.123080158  |
| 256.0783608 | 7.39260358 | 1.61109 | 1.98056E-09 | -1.129616217 | 196.0749057 | 6.09155082 | 1.40526 | 6.94816E-06 | 1.038732798  |
| 311.0762351 | 6.13136664 | 1.6081  | 1.27449E-08 | 1.394852368  | 203.0217284 | 0.94549425 | 1.21152 | 0.000507425 | 1.792134156  |
| 506.202716  | 6.35994941 | 1.60503 | 5.39292E-09 | 4.659098301  | 205.0367045 | 4.90160668 | 1.31351 | 7.2421E-05  | 1.051537824  |
| 221.1895053 | 9.69548463 | 1.60303 | 7.5662E-09  | -2.723065018 | 205.0370727 | 1.75303813 | 1.19589 | 0.000721798 | 0.775125958  |
| 781.213979  | 4.95527096 | 1.60243 | 4.18274E-09 | -1.573046108 | 211.0989768 | 6.09169406 | 1.42109 | 4.01882E-06 | 0.978729125  |
| 437.1828543 | 7.39187938 | 1.60113 | 7.58964E-09 | -0.990539139 | 215.0348045 | 0.79993486 | 1.17209 | 0.001398276 | 0.610848454  |
| 159.0947315 | 6.1166256  | 1.60095 | 7.72973E-09 | -1.113579432 | 218.1049902 | 2.99356153 | 1.34728 | 3.39847E-05 | 0.53502387   |
| 656.7300125 | 7.94956329 | 1.59991 | 1.07441E-08 | 1.530096888  | 218.1050188 | 2.67308091 | 1.39074 | 1.02312E-05 | 0.864842904  |
| 752.3333735 | 8.97589555 | 1.59838 | 7.23769E-09 | -1.913344775 | 221.0683087 | 8.59790578 | 1.23506 | 0.000335788 | -0.824751537 |
| 488.1914512 | 6.36053452 | 1.59755 | 9.38548E-09 | 4.289056035  | 221.1555411 | 12.591477  | 1.15739 | 0.001355531 | 0.157621358  |
| 113.0596215 | 7.3923233  | 1.59612 | 7.75618E-09 | -1.086636421 | 223.1349087 | 7.39439249 | 1.17288 | 0.000956336 | -0.587504707 |
| 249.0606992 | 7.38973291 | 1.59514 | 7.51656E-09 | -1.019237812 | 226.0380701 | 2.87917682 | 1.23408 | 0.000359133 | 0.526020368  |
| 569.1707721 | 6.07642866 | 1.59428 | 8.17985E-09 | -0.992602466 | 226.9211277 | 0.70942888 | 1.1963  | 0.000652728 | -0.637101119 |
| 265.1433966 | 7.74625351 | 1.59306 | 8.66868E-09 | -1.111239698 | 230.1049499 | 3.58851077 | 1.11179 | 0.002534724 | 0.797211019  |
| 483.2225222 | 8.78639035 | 1.59143 | 1.08032E-08 | -1.378075944 | 232.8996702 | 0.73630889 | 1.52136 | 4.79224E-08 | 0.834074946  |
| 189.1269437 | 7.39399315 | 1.59116 | 1.19078E-08 | -0.881856602 | 233.1197893 | 6.32914261 | 1.07409 | 0.00421614  | 0.859462889  |
| 657.2814808 | 5.96234999 | 1.5905  | 1.51904E-08 | 1.226892868  | 236.1059426 | 11.0537946 | 1.23147 | 0.000451241 | 0.61050018   |
| 595.9501703 | 5.939979   | 1.58816 | 2.92955E-08 | -1.052162362 | 237.0093634 | 1.06026667 | 1.50063 | 1.62256E-07 | 1.473334307  |
| 161.0930421 | 6.73797564 | 1.58044 | 2.60059E-08 | -0.762515003 | 237.009447  | 1.57126168 | 1.20952 | 0.000557129 | 0.677559068  |
| 298.1497383 | 3.20911904 | 1.58021 | 4.20882E-08 | 0.774945281  | 237.0637802 | 0.79266373 | 1.48899 | 3.03278E-07 | 0.839176533  |
| 229.122197  | 7.75074966 | 1.57996 | 2.18512E-08 | -1.23493319  | 237.1514505 | 8.61489751 | 1.34711 | 3.66604E-05 | 0.86835607   |
| 448.2124747 | 8.3954139  | 1.57793 | 2.63276E-08 | -3.471017836 | 239.1320666 | 8.61100126 | 1.25681 | 0.000242337 | 0.727650999  |
| 831.3245594 | 6.73732496 | 1.57779 | 3.05737E-08 | -1.357304389 | 239.1669953 | 8.06222283 | 1.18714 | 0.000894323 | 0.63436144   |
| 843.2550655 | 8.21837063 | 1.57711 | 2.61777E-08 | 2.153721931  | 241.0116984 | 0.7260886  | 1.21447 | 0.000583437 | -1.23237084  |
| 422.2022734 | 6.73712124 | 1.57699 | 3.57092E-08 | -0.830185536 | 241.1096136 | 6.73803411 | 1.27641 | 0.000166339 | -0.623052075 |
| 187.1110524 | 7.75160859 | 1.57673 | 2.72711E-08 | -1.140688267 | 241.1466577 | 8.06248028 | 1.1023  | 0.00335398  | 1.22691591   |
| 247.1327592 | 7.75067581 | 1.57629 | 2.76956E-08 | -1.345224262 | 242.177662  | 9.7445568  | 1.14048 | 0.001623137 | 0.611795882  |
| 346.1317568 | 5.24138314 | 1.57548 | 2.90997E-08 | 2.251986066  | 243.0643235 | 1.22161786 | 1.47065 | 6.03132E-07 | 2.60387246   |
| 601.240851  | 8.94338431 | 1.57527 | 3.89115E-08 | 1.103652244  | 246.9934337 | 3.57659337 | 1.24747 | 0.000378937 | 2.400953138  |
| 307.1766811 | 5.69424998 | 1.57402 | 3.84006E-08 | 5.926623996  | 246.993449  | 3.76748186 | 1.08846 | 0.004143868 | 2.28067661   |
| 225.1120078 | 5.24126955 | 1.57315 | 3.36741E-08 | 2.368299106  | 247.1202345 | 6.10010564 | 1.49962 | 1.50371E-07 | 2.337918234  |
| 352.1754396 | 7.76003611 | 1.5729  | 7.62711E-08 | -1.143858253 | 248.9031357 | 0.72903806 | 1.35162 | 2.96269E-05 | 0.863883593  |
| 626.2337211 | 6.73389012 | 1.57192 | 5.28124E-08 | -1.495844191 | 249.081218  | 5.76460041 | 1.33757 | 4.47904E-05 | 2.182901382  |
| 385.1505428 | 6.1082672  | 1.57177 | 3.70699E-08 | -1.249328929 | 249.0998727 | 2.89815818 | 1.018   | 0.006654487 | 2.97781848   |
| 475.2189811 | 7.26400473 | 1.56802 | 4.91722E-08 | -1.822572002 | 251.0795763 | 0.99522583 | 1.08496 | 0.003706474 | 4.821317535  |
| 463.1237329 | 7.79413571 | 1.56618 | 6.51359E-08 | -1.193605483 | 251.1666497 | 9.69462228 | 1.4006  | 8.04923E-06 | -1.468327127 |

|             |            |         |             |              |             |            |         |             |              |
|-------------|------------|---------|-------------|--------------|-------------|------------|---------|-------------|--------------|
| 427.2076005 | 3.35930056 | 1.56575 | 5.26048E-08 | 5.765641665  | 253.095136  | 1.20890514 | 1.06149 | 0.004002558 | 2.953110815  |
| 215.0158283 | 1.16277723 | 1.5632  | 6.3427E-08  | -1.881544506 | 253.1095304 | 5.15348158 | 1.22853 | 0.000433964 | 0.523563644  |
| 438.9802723 | 1.15899155 | 1.56279 | 6.52012E-08 | -2.393493196 | 254.0818808 | 2.99445512 | 1.36559 | 2.51465E-05 | 0.728353947  |
| 201.1294354 | 7.75067581 | 1.56116 | 6.86381E-08 | -1.185497134 | 259.0242974 | 0.72979056 | 1.15603 | 0.001349218 | 0.516445145  |
| 424.1501773 | 6.73712673 | 1.56067 | 9.5689E-08  | -1.265899032 | 260.0285214 | 1.39251324 | 1.21969 | 0.00049113  | 0.689969913  |
| 775.9236041 | 7.9547228  | 1.56051 | 9.36597E-08 | 1.557671514  | 261.075352  | 0.95781037 | 1.30228 | 9.79881E-05 | 1.295424333  |
| 692.4157734 | 7.2812864  | 1.55938 | 1.11152E-07 | 1.941929728  | 261.0897907 | 5.37674434 | 1.24776 | 0.000281512 | 0.423286081  |
| 510.1581573 | 5.98826065 | 1.55647 | 8.95808E-08 | -1.380750141 | 262.0594031 | 0.82642088 | 1.09835 | 0.003071696 | 0.56651202   |
| 207.1013706 | 6.73707099 | 1.55606 | 1.39204E-07 | -0.844190418 | 262.9270674 | 0.67598851 | 1.1211  | 0.001861023 | 0.318123486  |
| 165.0906616 | 5.79951497 | 1.55588 | 9.35164E-08 | -1.146192506 | 263.1306367 | 9.02690587 | 1.04076 | 0.004884692 | 0.548413335  |
| 340.1606853 | 5.8467817  | 1.55581 | 1.25765E-07 | -2.988696066 | 263.1306765 | 7.74594565 | 1.55269 | 4.53119E-09 | -1.045972273 |
| 270.0950686 | 8.34772233 | 1.55556 | 9.94402E-08 | -1.660088928 | 263.1306967 | 8.33642345 | 1.34674 | 3.40654E-05 | -0.630602151 |
| 225.1120036 | 6.73733642 | 1.5536  | 1.52816E-07 | -0.833777105 | 263.1422354 | 4.71989106 | 1.60078 | 2.24739E-11 | 5.736548559  |
| 496.2024761 | 7.63046316 | 1.55265 | 1.09309E-07 | 2.926969381  | 264.0894566 | 6.65531873 | 1.55312 | 4.65965E-09 | 1.876669962  |
| 880.0623947 | 8.75986411 | 1.55265 | 1.86573E-07 | 1.424561881  | 265.0953908 | 1.65345865 | 1.05865 | 0.004258641 | 0.898954793  |
| 119.0853999 | 7.39001093 | 1.55086 | 1.21753E-07 | -1.248862209 | 267.1253957 | 8.82564443 | 1.21579 | 0.000585482 | 3.625934345  |
| 243.1225702 | 6.73841859 | 1.54925 | 1.56485E-07 | -0.826711188 | 269.1046082 | 7.30406667 | 1.12918 | 0.002123336 | 0.795017274  |
| 213.1119454 | 5.15227338 | 1.54899 | 1.37448E-07 | 0.762310797  | 272.9607469 | 0.6758165  | 1.28275 | 0.000151057 | 0.508743644  |
| 727.2081823 | 5.3173441  | 1.54889 | 1.92986E-07 | -1.425937472 | 274.0954869 | 1.44499006 | 1.58034 | 2.87122E-10 | 1.415117921  |
| 807.2365231 | 5.98699216 | 1.54884 | 1.34397E-07 | -1.85558755  | 277.0945287 | 1.76260659 | 1.1023  | 0.002585263 | 0.663714827  |
| 352.1606589 | 6.10359716 | 1.54713 | 1.47473E-07 | 2.008866466  | 277.1310715 | 5.84412009 | 1.47495 | 5.05498E-07 | -2.759965821 |
| 311.076357  | 4.54329409 | 1.54665 | 3.52955E-07 | 1.363398414  | 279.1106403 | 3.20578796 | 1.51247 | 8.24174E-08 | 0.986785518  |
| 222.0652619 | 6.73808155 | 1.54611 | 1.57366E-07 | -0.843256456 | 279.1106811 | 2.83048486 | 1.45691 | 1.0596E-06  | 1.238042722  |
| 223.132564  | 6.57049306 | 1.54582 | 1.57043E-07 | -0.862041832 | 281.136557  | 4.3152403  | 1.14487 | 0.00161758  | -0.691693867 |
| 481.0905911 | 0.9615988  | 1.5457  | 1.62127E-07 | 2.359530357  | 281.1417998 | 8.61349015 | 1.30524 | 9.35078E-05 | 0.808106415  |
| 523.2125504 | 8.76786911 | 1.54569 | 1.57069E-07 | -2.764945516 | 282.1219217 | 0.79008691 | 1.34295 | 3.66517E-05 | 0.879451367  |
| 165.0907552 | 6.73864971 | 1.54469 | 1.95402E-07 | -0.816872545 | 283.1573842 | 8.06231298 | 1.1989  | 0.000738459 | 0.657835446  |
| 225.1119911 | 5.43316177 | 1.54316 | 1.82866E-07 | 2.644821234  | 284.1014928 | 0.77582653 | 1.19359 | 0.000696923 | 0.633595267  |
| 263.1278056 | 7.31805337 | 1.5418  | 1.96733E-07 | 3.851112894  | 287.0426258 | 4.30777358 | 1.2665  | 0.00018919  | 1.29025242   |
| 544.2051995 | 8.40502823 | 1.54077 | 2.298E-07   | 4.406631306  | 287.0428688 | 4.54580593 | 1.36834 | 2.22948E-05 | 0.661737118  |
| 440.2122254 | 8.47051296 | 1.54066 | 4.43048E-07 | 8.034100547  | 288.9891875 | 1.14383621 | 1.17467 | 0.000884465 | -0.865390904 |
| 357.1156399 | 6.10398192 | 1.54052 | 2.11275E-07 | 2.071424733  | 289.1312807 | 6.10021233 | 1.49841 | 1.58844E-07 | 2.265430459  |
| 605.1851366 | 5.80200787 | 1.5404  | 2.15813E-07 | -1.151000127 | 291.074308  | 4.04653925 | 1.15453 | 0.001911814 | -0.652840296 |
| 203.1791366 | 9.70361114 | 1.53871 | 3.06408E-07 | -2.435987765 | 291.0743371 | 4.32732125 | 1.01424 | 0.006555693 | -1.29719118  |
| 535.178908  | 8.33905814 | 1.53839 | 2.25575E-07 | -1.20329659  | 293.1258953 | 5.01272818 | 1.51676 | 5.86162E-08 | 0.694114069  |
| 594.235441  | 6.96748148 | 1.53788 | 5.1546E-07  | 1.949909344  | 293.1263877 | 4.40240536 | 1.11213 | 0.002366791 | 1.732257778  |
| 469.2430876 | 9.70268095 | 1.53782 | 3.54377E-07 | -2.505805146 | 293.1264835 | 4.79406801 | 1.26706 | 0.000221785 | 0.648187505  |
| 655.1931736 | 8.04720335 | 1.53767 | 2.77139E-07 | 1.429996089  | 293.1778948 | 11.0536763 | 1.22256 | 0.000558233 | 0.616142606  |

|             |            |         |             |              |             |            |         |             |              |
|-------------|------------|---------|-------------|--------------|-------------|------------|---------|-------------|--------------|
| 346.1319777 | 5.43340829 | 1.53653 | 2.53327E-07 | 2.455766598  | 294.8954784 | 0.70056199 | 1.26405 | 0.000211046 | -0.498567923 |
| 248.0810029 | 8.59983027 | 1.53602 | 2.5919E-07  | -1.431734581 | 295.0697801 | 0.88204455 | 1.06592 | 0.003667581 | 0.847299536  |
| 451.2326191 | 9.70362068 | 1.53551 | 3.58615E-07 | -2.608946768 | 295.0963241 | 1.47040702 | 1.09773 | 0.002518381 | 1.339792268  |
| 334.1648632 | 7.75433512 | 1.53461 | 4.08946E-07 | -1.246151343 | 298.1171662 | 0.78852308 | 1.22989 | 0.000387584 | 0.544420722  |
| 375.0926    | 2.95876653 | 1.53357 | 2.9967E-07  | -2.404539553 | 301.0737916 | 8.15901938 | 1.25116 | 0.000251721 | 0.404422834  |
| 773.2143732 | 5.16058067 | 1.53286 | 2.99908E-07 | 0.960617888  | 304.9157055 | 0.66805541 | 1.20229 | 0.000698911 | -0.838717967 |
| 179.105779  | 6.73839305 | 1.53279 | 3.36636E-07 | -0.699302958 | 308.9089538 | 0.66823455 | 1.20839 | 0.000581655 | -0.772241178 |
| 498.2187552 | 8.4638415  | 1.53208 | 3.05143E-07 | 2.663225623  | 309.0494359 | 0.9357686  | 1.47442 | 1.06529E-06 | 0.695090363  |
| 137.0957858 | 6.73797564 | 1.5318  | 3.77626E-07 | -0.793867997 | 309.1728152 | 11.2503729 | 1.00935 | 0.006821145 | 0.125105274  |
| 443.1881944 | 5.64417951 | 1.52908 | 3.58702E-07 | 0.862294911  | 311.1158686 | 7.30448409 | 1.11149 | 0.002766579 | 0.777951964  |
| 212.0079465 | 1.14970366 | 1.52907 | 3.52842E-07 | -1.890286992 | 312.0980459 | 1.28945039 | 1.27121 | 0.000216016 | 1.230802761  |
| 523.2146911 | 8.37804551 | 1.52894 | 3.71185E-07 | -2.300160688 | 315.0960319 | 0.80951509 | 1.23488 | 0.000336589 | 0.759695822  |
| 645.2756846 | 8.34878157 | 1.52796 | 4.75352E-07 | -1.098901263 | 315.1831312 | 7.63653876 | 1.16947 | 0.00101149  | -1.427535292 |
| 443.1317058 | 6.73733642 | 1.5278  | 4.2595E-07  | -0.782583338 | 316.104082  | 5.15991488 | 1.30207 | 9.76991E-05 | 0.566308653  |
| 465.1523879 | 7.75518279 | 1.52597 | 4.13889E-07 | -1.026679528 | 317.1988442 | 7.04424065 | 1.31148 | 7.57059E-05 | -0.999121377 |
| 247.1327278 | 8.33824032 | 1.52585 | 4.08197E-07 | -0.888449987 | 317.1989159 | 5.5502031  | 1.3406  | 3.95072E-05 | -1.456538417 |
| 410.2020378 | 6.89262506 | 1.5254  | 4.14352E-07 | 3.267621754  | 319.0693987 | 2.75752122 | 1.16566 | 0.001118821 | 0.914214548  |
| 306.1610577 | 5.8592358  | 1.52484 | 9.24401E-07 | 1.075886925  | 321.1576672 | 7.7899249  | 1.18577 | 0.001008808 | 0.925744507  |
| 509.2358128 | 9.70446504 | 1.52403 | 6.05242E-07 | -2.070069333 | 321.9067337 | 0.6508229  | 1.31402 | 8.04874E-05 | -1.096794658 |
| 651.1091431 | 0.97615859 | 1.52393 | 4.47966E-07 | 2.48260922   | 323.1371276 | 3.79605241 | 1.31107 | 9.28011E-05 | 0.507520005  |
| 477.1761896 | 8.34217207 | 1.5205  | 5.2843E-07  | -1.120995618 | 325.095296  | 5.13871446 | 1.16788 | 0.000989232 | 1.128430361  |
| 893.3035575 | 7.61597161 | 1.52    | 5.9377E-07  | 0.971166739  | 325.1371521 | 0.77414525 | 1.00425 | 0.007279171 | 0.684796607  |
| 871.248569  | 5.86925709 | 1.51971 | 8.97278E-07 | -0.748107506 | 327.0743142 | 6.13281958 | 1.55818 | 3.55901E-09 | 1.446887453  |
| 589.2260635 | 5.79886307 | 1.51965 | 6.36551E-07 | -1.029597851 | 327.0745752 | 4.55796383 | 1.41524 | 5.76001E-06 | 0.798001362  |
| 679.1843724 | 6.9182896  | 1.51913 | 5.74528E-07 | 2.09025125   | 328.0910651 | 1.65345865 | 1.05877 | 0.004499245 | 1.101843465  |
| 298.1496244 | 2.85132612 | 1.51847 | 1.21855E-06 | 1.42216782   | 329.0898539 | 2.95267872 | 1.52996 | 2.51772E-08 | -2.191365049 |
| 410.2014669 | 6.49938697 | 1.5183  | 5.60143E-07 | 2.744093184  | 329.1546524 | 11.0537295 | 1.11327 | 0.002755591 | 0.52308241   |
| 587.0939394 | 1.14726765 | 1.51811 | 5.84777E-07 | -1.860005964 | 331.1784719 | 7.95449321 | 1.40587 | 6.48053E-06 | 1.890533759  |
| 398.2007241 | 1.05024531 | 1.51748 | 5.96451E-07 | 1.980014118  | 334.1680899 | 8.56872403 | 1.05351 | 0.005521167 | -0.561505827 |
| 529.3019521 | 4.71553416 | 1.51563 | 1.05704E-06 | 6.838106258  | 335.1369686 | 6.09097092 | 1.54968 | 5.88075E-09 | 1.675720204  |
| 133.0834795 | 4.68342669 | 1.51552 | 6.39136E-07 | 2.58209125   | 337.0806497 | 0.90816323 | 1.3004  | 0.000100828 | 0.992462333  |
| 541.1905809 | 6.40059079 | 1.51519 | 6.96807E-07 | 1.136913685  | 341.0918497 | 4.18930052 | 1.34444 | 3.53714E-05 | 0.911026091  |
| 344.090842  | 1.238777   | 1.51361 | 1.84527E-06 | 0.922908837  | 342.1073236 | 3.20272623 | 1.52446 | 3.73715E-08 | 0.947778033  |
| 587.2864429 | 8.25891518 | 1.51295 | 7.33028E-07 | -0.794585933 | 342.1078147 | 2.82961766 | 1.30228 | 9.42337E-05 | 1.370711712  |
| 965.4588961 | 8.03612979 | 1.51258 | 8.19926E-07 | 1.593075649  | 347.0839168 | 3.99466612 | 1.28789 | 0.000125045 | 1.055229173  |
| 584.2551958 | 5.79972443 | 1.51203 | 7.75184E-07 | -0.93289996  | 350.1634517 | 7.75055056 | 1.3827  | 1.51839E-05 | -1.150711036 |
| 888.3479201 | 7.61173137 | 1.51196 | 7.36956E-07 | 1.064572483  | 351.0601288 | 0.93298785 | 1.3599  | 3.56578E-05 | 1.400181212  |
| 193.0326615 | 1.03187462 | 1.51089 | 7.94872E-07 | -2.286046457 | 351.1321366 | 4.10623711 | 1.12372 | 0.001907566 | 2.233850969  |

|             |            |         |             |              |             |            |         |             |              |
|-------------|------------|---------|-------------|--------------|-------------|------------|---------|-------------|--------------|
| 407.0329537 | 1.15129103 | 1.50959 | 8.06355E-07 | -2.712978242 | 354.1769241 | 7.05212495 | 1.35422 | 2.77149E-05 | -0.840409989 |
| 322.5682942 | 7.21465941 | 1.50693 | 1.08143E-06 | -1.651119167 | 355.0698703 | 3.77308399 | 1.36883 | 2.0571E-05  | 0.682731768  |
| 485.2384255 | 8.89320189 | 1.50679 | 9.05093E-07 | -1.427132425 | 356.12167   | 4.40240536 | 1.0866  | 0.003216387 | 1.445056429  |
| 853.3767167 | 7.95069365 | 1.50528 | 1.36603E-06 | 1.441548807  | 356.12195   | 4.7831547  | 1.59268 | 5.79597E-11 | 1.03709608   |
| 706.2579682 | 8.01585629 | 1.50454 | 1.11458E-06 | 1.980299838  | 356.1220658 | 5.01353522 | 1.33689 | 4.23948E-05 | 0.567478419  |
| 430.162701  | 1.03730728 | 1.50312 | 1.33825E-06 | 2.069059228  | 356.1736343 | 11.0535561 | 1.22677 | 0.000490442 | 0.625147115  |
| 467.1888893 | 4.59864224 | 1.50132 | 1.2669E-06  | -0.880789969 | 356.9942946 | 0.72704645 | 1.20307 | 0.000657853 | 0.855830443  |
| 949.2675189 | 8.0304143  | 1.50044 | 1.17576E-06 | 1.825781076  | 357.1203564 | 3.99843805 | 1.244   | 0.000286148 | 0.822548341  |
| 573.0980193 | 1.22394419 | 1.4986  | 1.24567E-06 | -0.789656291 | 358.1336293 | 4.2904203  | 1.17481 | 0.00100179  | -0.845736732 |
| 223.1288295 | 6.13085143 | 1.49793 | 1.27801E-06 | -0.846452971 | 362.1477066 | 5.97348763 | 1.42811 | 3.10917E-06 | 1.552539615  |
| 321.1644255 | 6.07696052 | 1.49789 | 1.38367E-06 | 2.866657083  | 362.8482044 | 0.71658857 | 1.18769 | 0.000759406 | -1.19012199  |
| 968.9142018 | 7.27849871 | 1.49757 | 1.66739E-06 | 1.666607085  | 363.068104  | 1.65574456 | 1.08026 | 0.003408015 | 0.793596127  |
| 147.1160671 | 8.39430518 | 1.49754 | 1.37014E-06 | -3.739533241 | 365.1477936 | 4.70201203 | 1.18796 | 0.000749402 | 0.610665222  |
| 723.9307677 | 8.24363244 | 1.4955  | 2.1237E-06  | 1.407612942  | 366.122426  | 6.53405972 | 1.45106 | 1.34102E-06 | 0.614517509  |
| 270.0944513 | 7.98364288 | 1.49456 | 1.44754E-06 | -1.25252986  | 368.1008375 | 2.81832316 | 1.03166 | 0.006720385 | 0.842417408  |
| 235.1689811 | 7.98009504 | 1.49437 | 1.45664E-06 | -1.635444403 | 368.8306096 | 0.72859599 | 1.45107 | 1.35087E-06 | 0.991615693  |
| 478.2286178 | 7.31836551 | 1.49293 | 1.63207E-06 | 3.711697954  | 369.1581507 | 7.78322595 | 1.41669 | 5.1884E-06  | -4.125115434 |
| 933.2856322 | 5.05631286 | 1.49224 | 1.57613E-06 | 2.357590038  | 371.173356  | 8.0841566  | 1.18113 | 0.000823501 | 1.421175693  |
| 444.2227344 | 7.74758603 | 1.49057 | 1.70711E-06 | -1.056460908 | 371.1734108 | 8.26084026 | 1.11502 | 0.002017431 | 1.651463235  |
| 235.1689702 | 8.35464206 | 1.48776 | 2.02944E-06 | -1.794358781 | 373.1893402 | 7.95552412 | 1.44876 | 1.46879E-06 | 1.588050115  |
| 483.1478602 | 6.09347931 | 1.48584 | 2.08955E-06 | 0.87951692   | 373.1894216 | 8.64394331 | 1.0226  | 0.007367956 | 2.021714315  |
| 807.4238036 | 7.2812864  | 1.48433 | 2.54951E-06 | 1.743746194  | 375.1328337 | 5.16676941 | 1.19348 | 0.000701751 | -1.073685894 |
| 916.019559  | 7.80928071 | 1.48424 | 2.23119E-06 | 1.274744684  | 375.1685174 | 6.41954723 | 1.28862 | 0.000139425 | 0.550924535  |
| 197.1161696 | 6.73890491 | 1.48202 | 2.72475E-06 | -0.721180673 | 376.0913131 | 3.49277136 | 1.12207 | 0.00183637  | 0.57582308   |
| 153.0901805 | 6.56628924 | 1.48201 | 2.28537E-06 | -0.956762098 | 377.1842561 | 8.20388618 | 1.06395 | 0.00391222  | 1.454300908  |
| 449.1769782 | 7.75027146 | 1.48084 | 3.17009E-06 | -0.712725257 | 379.1295749 | 5.79528992 | 1.47705 | 5.28291E-07 | 1.351478858  |
| 302.0398563 | 1.15146033 | 1.47979 | 2.84233E-06 | -1.531887302 | 379.1634031 | 6.49777717 | 1.31295 | 8.32635E-05 | 1.574734356  |
| 527.2596215 | 3.97361237 | 1.4784  | 4.51495E-06 | 1.677322458  | 380.1586781 | 3.27657961 | 1.30699 | 0.000104421 | 0.74874859   |
| 393.0367333 | 0.96203515 | 1.47814 | 2.64247E-06 | -4.760110789 | 381.0708549 | 0.91916323 | 1.30543 | 0.000120505 | 0.64697336   |
| 286.0922604 | 1.4660402  | 1.4781  | 2.92984E-06 | 1.792361101  | 381.0851866 | 6.6565532  | 1.43896 | 2.36432E-06 | 1.058853586  |
| 515.1193943 | 7.6816516  | 1.47742 | 2.68672E-06 | 1.014325703  | 381.1344289 | 6.87651164 | 1.04253 | 0.005152389 | 0.418396168  |
| 911.219135  | 5.9397854  | 1.4758  | 2.83302E-06 | -0.848618791 | 382.1029038 | 3.22346997 | 1.07483 | 0.003831252 | 1.198269451  |
| 749.3386557 | 9.09272778 | 1.47425 | 3.81122E-06 | 1.928128928  | 383.1733606 | 7.1837815  | 1.3202  | 6.33734E-05 | 0.821547489  |
| 579.1712284 | 7.61769701 | 1.47321 | 3.36444E-06 | -1.03139319  | 384.118484  | 5.84592166 | 1.4596  | 9.63751E-07 | -2.663388784 |
| 131.0490022 | 7.15724287 | 1.47264 | 3.14463E-06 | -1.950588587 | 385.0790389 | 4.50041121 | 1.18056 | 0.001228214 | 0.41531336   |
| 780.8626811 | 9.24743786 | 1.4712  | 5.92916E-06 | 1.15631981   | 385.079234  | 4.24655119 | 1.41062 | 6.88505E-06 | 1.169506589  |
| 226.5650991 | 4.97222791 | 1.47075 | 4.1734E-06  | -0.96875264  | 385.1889244 | 8.39020136 | 1.39411 | 9.28571E-06 | -3.879859908 |
| 504.2803511 | 9.70624958 | 1.4707  | 4.37195E-06 | -2.426061722 | 386.941194  | 0.66775553 | 1.27012 | 0.000227107 | 1.12695419   |

|             |            |         |             |              |             |            |         |             |              |
|-------------|------------|---------|-------------|--------------|-------------|------------|---------|-------------|--------------|
| 501.2336101 | 7.97417866 | 1.46968 | 3.47858E-06 | -1.282826083 | 387.1314498 | 4.5642155  | 1.35783 | 2.57601E-05 | -2.399302605 |
| 147.0268383 | 1.02473661 | 1.46944 | 3.70467E-06 | -1.92198911  | 389.0158895 | 0.92977636 | 1.21638 | 0.000713145 | 0.981026621  |
| 525.1209329 | 1.04508637 | 1.4678  | 3.96408E-06 | 1.639655978  | 389.1691713 | 6.15795211 | 1.27827 | 0.000195392 | 1.524152646  |
| 467.0846809 | 0.99942256 | 1.46672 | 3.84796E-06 | 2.072651265  | 389.183901  | 6.68108103 | 1.20015 | 0.000714698 | 1.326578614  |
| 449.7162389 | 8.40589531 | 1.46668 | 6.57947E-06 | 1.736042509  | 390.1536123 | 7.05245895 | 1.28667 | 0.000127548 | -0.770376719 |
| 478.1915675 | 6.08794687 | 1.46659 | 3.86286E-06 | 0.796383855  | 391.1636017 | 6.88014934 | 1.51719 | 5.73044E-08 | 1.912902669  |
| 239.1276724 | 5.11212242 | 1.46645 | 3.955E-06   | 0.802972847  | 391.1636751 | 6.49434422 | 1.49242 | 2.3164E-07  | 2.951493613  |
| 979.2771918 | 7.99754755 | 1.46632 | 3.98708E-06 | 1.391051871  | 392.1739138 | 8.19446412 | 1.41042 | 5.64204E-06 | 1.064821749  |
| 918.9970196 | 7.71908157 | 1.46536 | 4.17293E-06 | 1.201728126  | 392.8964499 | 0.6800157  | 1.15604 | 0.001289778 | 0.518123795  |
| 702.7136164 | 7.36055957 | 1.46475 | 5.66088E-06 | 1.311754419  | 393.1428148 | 5.02605558 | 1.03471 | 0.006331364 | 4.288435233  |
| 574.1994899 | 3.96214176 | 1.46098 | 5.17962E-06 | 1.614913398  | 393.178543  | 5.61617574 | 1.1524  | 0.001300513 | 1.004869727  |
| 918.0785941 | 8.02215042 | 1.4607  | 4.8926E-06  | 1.041472611  | 393.178814  | 4.64925901 | 1.29027 | 0.000136958 | 1.85383083   |
| 342.2137987 | 4.58117116 | 1.46    | 4.75862E-06 | -1.589425802 | 393.1791967 | 7.82738283 | 1.43253 | 3.26238E-06 | 2.071081742  |
| 969.87326   | 7.8074674  | 1.45982 | 5.03844E-06 | 1.226494219  | 394.9414251 | 0.72531892 | 1.17308 | 0.000958393 | 0.646231076  |
| 234.18109   | 0.72016141 | 1.45925 | 4.88513E-06 | 0.647804647  | 396.1169917 | 6.09604063 | 1.53127 | 2.25662E-08 | 2.220134365  |
| 576.2078286 | 8.3808468  | 1.45733 | 8.39323E-06 | 4.451482075  | 398.1687962 | 2.99361584 | 1.1845  | 0.000871838 | 0.758546531  |
| 605.2413904 | 5.63514747 | 1.45723 | 5.20015E-06 | 1.014029774  | 399.0955755 | 5.56889557 | 1.34607 | 4.04547E-05 | 1.031704628  |
| 411.1052669 | 4.96930272 | 1.45689 | 6.28536E-06 | -1.274749995 | 399.0961515 | 4.89698394 | 1.29973 | 9.75321E-05 | 1.032072379  |
| 189.1593227 | 0.74139628 | 1.45544 | 6.13711E-06 | 0.964675465  | 399.1680815 | 6.74923241 | 1.59067 | 8.62442E-11 | 1.366104305  |
| 332.1239123 | 0.97444051 | 1.45528 | 5.73578E-06 | 0.75993284   | 399.1682614 | 5.11421593 | 1.46997 | 6.14084E-07 | 1.25884094   |
| 577.1921419 | 8.88928436 | 1.45412 | 5.73339E-06 | -3.118871052 | 403.1626583 | 6.73790883 | 1.40823 | 6.77053E-06 | -0.731467657 |
| 622.2341153 | 7.32739717 | 1.45308 | 6.56882E-06 | 1.320116959  | 403.1636775 | 5.80035629 | 1.53764 | 1.49597E-08 | -1.770842835 |
| 399.2368763 | 8.52294245 | 1.45172 | 6.14692E-06 | -1.941024966 | 405.0311979 | 1.19120134 | 1.30878 | 8.13488E-05 | -0.848071058 |
| 727.2069741 | 5.74735855 | 1.45049 | 8.61054E-06 | -0.842001696 | 405.1361174 | 7.77811326 | 1.49306 | 2.27071E-07 | -1.867209025 |
| 267.1699298 | 3.85060208 | 1.44979 | 8.42104E-06 | 3.089646653  | 407.1135007 | 4.9709379  | 1.29725 | 0.000107725 | -0.765862805 |
| 382.1709105 | 3.28837438 | 1.44924 | 6.63457E-06 | 0.651935674  | 407.1585455 | 6.05985118 | 1.1103  | 0.002815388 | 0.570206472  |
| 137.0829379 | 5.81473948 | 1.44845 | 7.20195E-06 | -1.179923593 | 407.1589452 | 6.46928166 | 1.23117 | 0.000459862 | 2.882226821  |
| 658.2553378 | 6.91571541 | 1.44752 | 7.01546E-06 | 3.102317597  | 408.1536526 | 6.87310531 | 1.31571 | 7.39073E-05 | 0.756486167  |
| 571.2449389 | 5.06610523 | 1.44534 | 8.87606E-06 | 1.435316514  | 411.2052483 | 8.60256138 | 1.32378 | 5.75278E-05 | -0.978108364 |
| 129.01566   | 1.02577294 | 1.44469 | 8.23674E-06 | -2.030918501 | 413.1480244 | 7.74557517 | 1.50797 | 9.4728E-08  | 2.081838817  |
| 663.2226631 | 6.92384192 | 1.44454 | 7.78229E-06 | 2.31339271   | 414.1276372 | 4.09459607 | 1.12573 | 0.001862979 | 2.021363219  |
| 513.1964499 | 8.33731707 | 1.44324 | 8.54506E-06 | -0.587595362 | 414.2230872 | 8.66023678 | 1.34944 | 3.12235E-05 | -2.715253177 |
| 609.1816329 | 8.71943823 | 1.44133 | 8.7551E-06  | 1.24011648   | 415.1633232 | 6.09140757 | 1.38065 | 1.37423E-05 | 0.823071807  |
| 1030.427828 | 7.80790061 | 1.44098 | 8.78412E-06 | 1.160298787  | 415.1639564 | 7.77998568 | 1.5526  | 5.78583E-09 | -3.037952755 |
| 479.1887706 | 8.59983491 | 1.43927 | 8.94933E-06 | -0.94076531  | 416.1679304 | 7.76642944 | 1.47634 | 5.4852E-07  | 2.733157992  |
| 675.8457728 | 7.47233711 | 1.43913 | 1.02502E-05 | -2.706683259 | 417.0853014 | 8.89953177 | 1.0573  | 0.004252415 | 1.150177743  |
| 533.8780915 | 4.95557629 | 1.43912 | 3.57034E-05 | 1.008928008  | 417.0853132 | 9.19434891 | 1.05051 | 0.004519361 | 1.257708857  |
| 724.3835494 | 8.03725979 | 1.43852 | 1.05024E-05 | 1.439973519  | 417.1430901 | 4.96970812 | 1.33957 | 4.19083E-05 | -0.646927416 |

|             |            |         |             |              |             |            |         |             |              |
|-------------|------------|---------|-------------|--------------|-------------|------------|---------|-------------|--------------|
| 209.1531835 | 8.58973064 | 1.43785 | 9.56679E-06 | -1.151870242 | 417.1728838 | 7.05538835 | 1.11646 | 0.002024052 | -1.111935482 |
| 450.2339237 | 6.71319308 | 1.43782 | 1.08463E-05 | -0.892701966 | 418.1015405 | 7.30448409 | 1.14527 | 0.001728096 | 0.776419965  |
| 1037.344504 | 7.98526542 | 1.43741 | 9.44737E-06 | 1.530069796  | 418.8964703 | 0.66775553 | 1.05658 | 0.005479842 | -0.531835605 |
| 700.2278714 | 5.74804241 | 1.43684 | 9.5525E-06  | -2.261124982 | 419.1505399 | 7.18269255 | 1.36367 | 2.23047E-05 | 1.080136934  |
| 390.1760951 | 4.97149024 | 1.43564 | 1.03466E-05 | -0.88751648  | 419.1583581 | 5.15651548 | 1.47253 | 5.50791E-07 | 0.887005174  |
| 536.8964606 | 4.95564021 | 1.43558 | 3.50352E-05 | 1.010727101  | 419.1948432 | 7.94988391 | 1.42222 | 3.84769E-06 | 1.843126325  |
| 211.5596052 | 4.56624199 | 1.43419 | 1.0432E-05  | -2.371762034 | 421.0053975 | 1.14978377 | 1.43149 | 2.77989E-06 | -0.957070382 |
| 525.2309687 | 8.55121924 | 1.42996 | 1.17414E-05 | -1.87193816  | 421.1659241 | 5.99431514 | 1.27934 | 0.000166801 | -0.740822712 |
| 233.0774368 | 7.74740682 | 1.42928 | 1.53765E-05 | -1.073109656 | 421.1739477 | 7.4727524  | 1.30888 | 8.53713E-05 | -1.822026546 |
| 536.2333713 | 6.40353431 | 1.42881 | 1.24559E-05 | 2.156606933  | 421.1742922 | 7.7994719  | 1.14475 | 0.001788597 | 1.881730175  |
| 588.2664292 | 7.39565692 | 1.42844 | 1.21219E-05 | -0.835021363 | 422.9053791 | 0.67771749 | 1.31621 | 8.59688E-05 | -0.761765568 |
| 314.1060747 | 5.75005013 | 1.42615 | 1.29262E-05 | -2.381658308 | 423.1887416 | 5.73974361 | 1.43455 | 2.47988E-06 | 1.742076907  |
| 241.1518447 | 1.04518963 | 1.42613 | 1.54095E-05 | 0.557589339  | 424.8570469 | 0.7004518  | 1.3003  | 0.000117764 | -0.773613531 |
| 898.42334   | 8.41125524 | 1.42586 | 1.36867E-05 | 0.705128454  | 425.1845038 | 7.74736291 | 1.58691 | 1.26707E-10 | -0.965240328 |
| 421.1851136 | 8.59381843 | 1.42431 | 1.74309E-05 | -1.552847106 | 427.1987864 | 7.38940686 | 1.57437 | 5.89515E-10 | -0.987549738 |
| 387.199853  | 5.99570046 | 1.42414 | 1.371E-05   | -1.051561772 | 427.1996556 | 6.90328926 | 1.52682 | 3.41434E-08 | -1.910579614 |
| 193.0857655 | 4.97203751 | 1.42384 | 1.47999E-05 | -0.713174314 | 427.9133203 | 7.39143602 | 1.50418 | 1.27737E-07 | -1.154263348 |
| 767.2727277 | 4.96952892 | 1.42346 | 1.68214E-05 | -1.786082077 | 429.2152355 | 7.9969548  | 1.32768 | 5.93775E-05 | -0.634237288 |
| 407.1675876 | 7.18988441 | 1.42338 | 1.45688E-05 | 0.688199865  | 430.1836932 | 7.18256309 | 1.22754 | 0.000395238 | 2.153166977  |
| 325.1282024 | 8.48152011 | 1.42325 | 1.53766E-05 | 0.675258798  | 430.8149531 | 0.70748651 | 1.09323 | 0.002679248 | -0.888349271 |
| 457.2073425 | 8.60463872 | 1.42276 | 1.44816E-05 | -1.29078705  | 431.1008758 | 7.4573218  | 1.55474 | 4.49539E-09 | -2.100283137 |
| 709.1993999 | 7.74252118 | 1.42269 | 2.40156E-05 | -0.854952962 | 431.1235566 | 5.39578699 | 1.38725 | 1.14429E-05 | 0.563685845  |
| 392.1914748 | 5.15174883 | 1.42237 | 1.72083E-05 | 0.610000085  | 431.1945796 | 5.98638276 | 1.4321  | 2.7887E-06  | -0.919701803 |
| 227.093828  | 7.26338944 | 1.42101 | 1.50619E-05 | -1.100940821 | 432.1540569 | 7.77551093 | 1.45838 | 1.13636E-06 | -1.904523957 |
| 191.142706  | 8.59983491 | 1.4207  | 1.5298E-05  | -1.061912136 | 433.1742764 | 7.63551758 | 1.49028 | 2.61085E-07 | 3.478970117  |
| 220.1179724 | 2.68856518 | 1.42029 | 1.51665E-05 | 0.747911188  | 433.1744262 | 7.98939159 | 1.08714 | 0.003530591 | 1.000113407  |
| 427.1575386 | 6.73881047 | 1.42018 | 1.52595E-05 | -0.67365181  | 434.873486  | 0.66786138 | 1.21865 | 0.000498264 | -1.084382536 |
| 393.199093  | 7.63004865 | 1.4183  | 1.64758E-05 | 1.511607796  | 435.1458602 | 5.11874206 | 1.19676 | 0.000630049 | 0.844940716  |
| 603.072096  | 1.23748671 | 1.41779 | 1.67676E-05 | -1.405960083 | 435.1899497 | 8.45521638 | 1.00167 | 0.007771213 | 2.549249782  |
| 265.1436301 | 4.33279259 | 1.41662 | 1.7388E-05  | -0.902877067 | 435.960594  | 1.17601834 | 1.51021 | 8.35876E-08 | -2.584691078 |
| 207.1378109 | 5.98910705 | 1.41649 | 1.72437E-05 | -1.172506665 | 437.2203092 | 9.56193864 | 1.37825 | 1.7023E-05  | -0.917538948 |
| 439.1974423 | 8.59983491 | 1.41555 | 1.74697E-05 | -1.072119429 | 437.2204947 | 8.79102128 | 1.43195 | 2.77259E-06 | -0.935750978 |
| 307.0759553 | 0.97444051 | 1.41344 | 1.81888E-05 | 1.452302145  | 438.0919126 | 0.93005633 | 1.48584 | 5.13839E-07 | 1.290007462  |
| 625.1768529 | 6.3926023  | 1.41144 | 3.65073E-05 | -0.73573187  | 439.2358621 | 8.92371857 | 1.37125 | 1.77678E-05 | -1.26401883  |
| 693.2009616 | 8.70791736 | 1.41103 | 2.11683E-05 | 3.269227991  | 440.8375112 | 0.70056199 | 1.32729 | 5.37467E-05 | -1.163487021 |
| 819.4217773 | 7.36055957 | 1.41053 | 2.15525E-05 | 1.318534541  | 441.1788222 | 5.65529376 | 1.17723 | 0.000849623 | 1.08825109   |
| 1099.049079 | 7.80864655 | 1.41    | 2.08754E-05 | 1.117665438  | 441.2519026 | 9.70315528 | 1.43074 | 3.30102E-06 | -2.345697767 |
| 420.2585963 | 5.66241864 | 1.40892 | 2.07763E-05 | -2.807083552 | 442.1344132 | 6.46045338 | 1.0865  | 0.002995989 | 2.263809142  |

|             |            |         |             |              |             |            |         |             |              |
|-------------|------------|---------|-------------|--------------|-------------|------------|---------|-------------|--------------|
| 549.1582569 | 8.40305224 | 1.40826 | 2.35943E-05 | 1.724227941  | 443.1945639 | 6.57256351 | 1.47649 | 4.67218E-07 | -0.842768579 |
| 569.3202185 | 7.86808709 | 1.40819 | 2.56117E-05 | 1.795526658  | 443.1946709 | 5.74253188 | 1.40576 | 6.90755E-06 | -1.079718562 |
| 1075.307786 | 6.23401388 | 1.40717 | 2.94036E-05 | -0.613462671 | 443.1947988 | 4.59998537 | 1.3256  | 5.5343E-05  | -0.549866406 |
| 286.0923792 | 1.89386522 | 1.40629 | 2.40259E-05 | 1.783606431  | 445.1590156 | 1.6796475  | 1.41933 | 4.26607E-06 | 1.051478486  |
| 867.8764665 | 7.8082616  | 1.40462 | 2.32254E-05 | 1.072409921  | 445.1740052 | 5.11141874 | 1.44522 | 1.68424E-06 | 0.703502066  |
| 557.1843779 | 4.46348503 | 1.40439 | 2.79093E-05 | -1.09383844  | 445.2469226 | 8.60550597 | 1.35251 | 2.89602E-05 | -1.007129702 |
| 555.0906548 | 1.0080398  | 1.40296 | 2.37364E-05 | -6.22496152  | 446.1692414 | 7.1825559  | 1.33802 | 4.12922E-05 | 0.904174543  |
| 111.005354  | 1.02829932 | 1.40281 | 2.6522E-05  | -2.033401877 | 446.8210644 | 0.7084668  | 1.14171 | 0.001614769 | -0.824578525 |
| 139.0006109 | 1.0290774  | 1.40251 | 2.72551E-05 | -1.752184925 | 447.0985904 | 6.67482622 | 1.37859 | 2.19269E-05 | -0.847925996 |
| 279.170129  | 6.94275242 | 1.40229 | 3.54768E-05 | -1.827994327 | 447.1895862 | 4.1795071  | 1.4125  | 5.24063E-06 | -0.617751248 |
| 289.6684705 | 5.19334598 | 1.40118 | 2.54577E-05 | -1.124686014 | 447.1897439 | 4.53346206 | 1.37278 | 1.87343E-05 | -0.709452323 |
| 163.1110901 | 5.99073765 | 1.40075 | 2.59072E-05 | -1.114754553 | 448.1849143 | 5.99039986 | 1.29988 | 0.0001081   | -0.930965759 |
| 356.1890527 | 7.04975088 | 1.40025 | 2.54024E-05 | -1.074163754 | 449.1115721 | 6.05510031 | 1.23518 | 0.000465236 | -0.761782146 |
| 334.0451905 | 5.10179749 | 1.39966 | 2.90381E-05 | -1.128790021 | 449.1974278 | 7.26396908 | 1.26198 | 0.000206422 | -0.825336422 |
| 807.3414739 | 9.03502954 | 1.3983  | 2.73306E-05 | 1.791182419  | 450.2001158 | 6.87194221 | 1.26262 | 0.000222047 | -1.130434875 |
| 161.1318567 | 7.39390481 | 1.39824 | 4.02054E-05 | -0.620326145 | 451.1492444 | 5.88783194 | 1.10848 | 0.002690965 | 0.513134657  |
| 613.1539403 | 0.98270355 | 1.39742 | 3.14587E-05 | 1.147052789  | 451.2094363 | 7.77293984 | 1.2339  | 0.000437519 | 1.753571662  |
| 619.1800353 | 7.91603955 | 1.39673 | 2.77524E-05 | -0.913922002 | 453.2146534 | 7.80112383 | 1.35258 | 2.88552E-05 | -1.562478211 |
| 475.1429574 | 6.47431894 | 1.39662 | 3.13022E-05 | 2.582860858  | 454.0196111 | 11.0525421 | 1.06081 | 0.005123485 | 0.965297641  |
| 523.2138833 | 9.69445452 | 1.39557 | 3.61167E-05 | -1.438275668 | 454.158912  | 6.88227829 | 1.49547 | 2.02883E-07 | 3.042987694  |
| 191.1426922 | 8.17942499 | 1.39538 | 2.98852E-05 | -1.64941348  | 454.1591837 | 6.49403753 | 1.5489  | 6.16896E-09 | 2.988625816  |
| 157.0106192 | 1.03151022 | 1.39533 | 3.13237E-05 | -1.887415115 | 455.2310131 | 8.35178389 | 1.50281 | 1.40529E-07 | -2.140336557 |
| 447.1263896 | 8.31298878 | 1.39502 | 2.89685E-05 | 3.221645677  | 455.231511  | 7.98288149 | 1.43046 | 2.86576E-06 | -1.009301346 |
| 664.2254169 | 6.95027205 | 1.39493 | 2.89646E-05 | -1.902529585 | 457.1230142 | 1.37231287 | 1.33807 | 4.73213E-05 | 3.554886994  |
| 211.1685957 | 8.65611568 | 1.39311 | 3.0273E-05  | -1.758664836 | 457.2468667 | 8.5756103  | 1.17492 | 0.000900297 | -2.418338718 |
| 870.671253  | 7.72143111 | 1.39277 | 3.14474E-05 | 0.939400736  | 458.2493072 | 8.56626109 | 1.13503 | 0.001580896 | -1.692061456 |
| 367.1369088 | 6.14000668 | 1.39225 | 3.09142E-05 | -0.4532551   | 459.2256009 | 7.26573983 | 1.26276 | 0.000203751 | -0.659527976 |
| 427.2056116 | 1.07057986 | 1.39123 | 5.30577E-05 | 10.75179243  | 461.0999881 | 1.02717626 | 1.46234 | 8.50737E-07 | 2.265067872  |
| 409.183445  | 5.99059466 | 1.39109 | 3.4242E-05  | -0.928836525 | 461.1600398 | 7.75009455 | 1.56681 | 1.25048E-09 | -0.995079714 |
| 242.0812812 | 4.32824743 | 1.39085 | 3.20133E-05 | -1.136008965 | 462.1640429 | 9.32283769 | 1.07769 | 0.003236615 | 1.575899355  |
| 688.3183406 | 7.39118284 | 1.39077 | 3.20488E-05 | -0.937663575 | 462.164303  | 5.11728622 | 1.30166 | 9.60395E-05 | 0.86550344   |
| 230.9856886 | 1.0119501  | 1.39017 | 3.46289E-05 | -1.596519268 | 464.1799784 | 5.76462248 | 1.15435 | 0.001250737 | -0.577565514 |
| 178.5980503 | 7.05128457 | 1.38935 | 3.31481E-05 | -1.406679855 | 464.180454  | 4.17513596 | 1.43188 | 2.74482E-06 | -0.880594075 |
| 701.9182445 | 6.87775762 | 1.38768 | 3.66458E-05 | -2.406686135 | 465.1426611 | 7.18228894 | 1.29999 | 0.000100604 | -0.875279419 |
| 210.0599546 | 1.15529504 | 1.3872  | 3.83869E-05 | -1.917330851 | 465.2003242 | 6.87249164 | 1.00174 | 0.007445172 | 1.212507474  |
| 161.0594543 | 4.97231702 | 1.38711 | 3.6114E-05  | -0.65635065  | 466.1592971 | 6.73942428 | 1.363   | 2.39376E-05 | -0.495554316 |
| 467.1902469 | 4.34094854 | 1.38473 | 3.89006E-05 | -0.903992267 | 467.1221078 | 8.06189344 | 1.1204  | 0.002770608 | -0.728227745 |
| 283.1623799 | 1.04777881 | 1.38138 | 5.3525E-05  | 2.928720855  | 467.1221371 | 8.58419154 | 1.18699 | 0.000980887 | -1.148839344 |

|             |            |         |             |              |             |            |         |             |              |
|-------------|------------|---------|-------------|--------------|-------------|------------|---------|-------------|--------------|
| 137.0958431 | 8.59866534 | 1.38075 | 4.06486E-05 | -0.954317949 | 467.1948512 | 8.33877842 | 1.39846 | 8.1278E-06  | -0.786168971 |
| 123.48535   | 0.72109256 | 1.37862 | 4.30363E-05 | -0.704889285 | 471.189955  | 7.3896366  | 1.5599  | 2.45295E-09 | -0.896180232 |
| 837.7557407 | 7.42553066 | 1.37727 | 4.40323E-05 | 1.067171895  | 471.1902438 | 7.74661804 | 1.59046 | 7.71612E-11 | -0.913305252 |
| 395.1313846 | 4.97193623 | 1.37703 | 6.08734E-05 | -1.109135113 | 472.1608326 | 3.93149836 | 1.03024 | 0.006153083 | 0.350260137  |
| 173.4312201 | 0.70510175 | 1.37493 | 4.74918E-05 | -1.599746482 | 473.1318399 | 7.87648274 | 1.516   | 9.23199E-08 | -1.509672998 |
| 648.1115407 | 5.10179749 | 1.37464 | 4.80176E-05 | -2.19239595  | 475.2211647 | 8.69040576 | 1.56543 | 1.50504E-09 | 2.871898583  |
| 663.2568661 | 7.5370993  | 1.37192 | 5.26651E-05 | 1.661825983  | 475.2545637 | 8.05719181 | 1.42193 | 3.95179E-06 | -1.404699943 |
| 369.1522668 | 6.88464189 | 1.3712  | 5.92385E-05 | 0.658579574  | 476.2163848 | 7.26389167 | 1.19033 | 0.000707932 | -0.679658441 |
| 699.8491718 | 6.10438982 | 1.37114 | 5.31486E-05 | -1.837794384 | 477.1495572 | 0.81887995 | 1.04071 | 0.005693587 | 0.682260982  |
| 329.1593811 | 6.87169901 | 1.36992 | 6.73757E-05 | 0.808138825  | 477.1642068 | 7.6602657  | 1.39242 | 1.17331E-05 | 4.06534889   |
| 618.2593206 | 1.04863058 | 1.36946 | 7.10394E-05 | 3.294469138  | 479.1714386 | 4.32769481 | 1.24813 | 0.000271828 | -0.733919743 |
| 131.0490117 | 4.56552619 | 1.36925 | 5.30514E-05 | -2.351098195 | 480.1746614 | 7.94788727 | 1.46187 | 9.2076E-07  | 1.612854297  |
| 251.1278404 | 7.05671427 | 1.36827 | 5.72758E-05 | -0.8952047   | 480.1760845 | 8.65215565 | 1.10336 | 0.00296612  | 1.982027802  |
| 337.053114  | 5.10179749 | 1.36741 | 6.49754E-05 | -0.893422624 | 483.2253728 | 8.78507617 | 1.41311 | 5.82228E-06 | -0.940346933 |
| 672.3218779 | 8.59844821 | 1.3669  | 5.57977E-05 | -1.106586248 | 485.2052305 | 6.0505598  | 1.12952 | 0.00173238  | -0.449153545 |
| 285.0876678 | 6.03758453 | 1.36568 | 5.83866E-05 | -0.581557592 | 487.180003  | 0.80694232 | 1.07202 | 0.003662385 | 1.092764036  |
| 423.0898927 | 5.55990792 | 1.36543 | 6.71671E-05 | 0.743535154  | 488.1392105 | 6.73808453 | 1.16287 | 0.001314704 | -0.737758031 |
| 227.1640523 | 5.92301415 | 1.36308 | 6.33426E-05 | -1.750096488 | 488.1673539 | 0.82070102 | 1.28302 | 0.000152017 | -1.344103584 |
| 683.215874  | 7.41125438 | 1.3628  | 6.11595E-05 | 1.595890419  | 488.1801131 | 7.74830532 | 1.48766 | 2.72525E-07 | -0.706248947 |
| 744.7905801 | 7.42394068 | 1.36271 | 6.20627E-05 | 1.125088044  | 488.8951534 | 0.67728182 | 1.28488 | 0.000134217 | 0.686388536  |
| 552.2285204 | 4.46688917 | 1.3619  | 6.39361E-05 | -1.052821377 | 489.2006756 | 4.32408685 | 1.37817 | 1.51032E-05 | -0.964829196 |
| 525.1221029 | 1.34240966 | 1.36122 | 7.71596E-05 | 1.213356148  | 490.1244427 | 7.15639811 | 1.43191 | 2.8208E-06  | -1.613616035 |
| 644.1250594 | 4.9549583  | 1.35987 | 0.000174761 | 0.910176524  | 490.1804829 | 4.56615099 | 1.05251 | 0.004281053 | -0.853673284 |
| 152.1055922 | 1.63395222 | 1.35932 | 9.78984E-05 | -1.258011822 | 491.1711447 | 8.59242195 | 1.30988 | 7.85899E-05 | -0.951685536 |
| 189.1269695 | 5.99437127 | 1.35851 | 6.89018E-05 | -0.678891185 | 491.1810203 | 5.33700718 | 1.24066 | 0.00037592  | 1.313895614  |
| 372.1874329 | 5.06992143 | 1.35814 | 6.73576E-05 | -1.073636165 | 492.1750117 | 8.39080744 | 1.38918 | 1.07394E-05 | -3.794325927 |
| 397.2217629 | 8.19123786 | 1.3581  | 7.06924E-05 | -4.37960907  | 492.885287  | 0.71645005 | 1.02125 | 0.006655892 | 0.331221548  |
| 248.0737245 | 5.01630378 | 1.35796 | 8.15578E-05 | 0.594270508  | 493.158895  | 6.73607015 | 1.41314 | 6.22861E-06 | -0.878362751 |
| 581.0612554 | 7.27812991 | 1.35746 | 0.000117117 | 1.600570569  | 494.0967413 | 7.4483303  | 1.50587 | 1.16595E-07 | -2.087236531 |
| 817.2004674 | 1.05633145 | 1.35636 | 9.5012E-05  | 2.143450237  | 495.1742066 | 5.83821365 | 1.18732 | 0.000848911 | 2.604897932  |
| 350.090486  | 3.86423123 | 1.35625 | 7.24962E-05 | 0.835934254  | 497.1818051 | 6.37299429 | 1.33809 | 4.1199E-05  | -1.124402943 |
| 599.1977095 | 7.59646343 | 1.3561  | 7.04266E-05 | -1.28355481  | 498.1575215 | 6.8803947  | 1.12809 | 0.001759645 | -1.031906759 |
| 253.179744  | 7.26756215 | 1.35603 | 7.2558E-05  | -0.919580911 | 499.1333636 | 0.95475144 | 1.39594 | 1.04045E-05 | 2.505820029  |
| 350.0908314 | 4.22578575 | 1.35569 | 7.19905E-05 | 0.822507772  | 499.2179063 | 8.34973979 | 1.34916 | 3.40194E-05 | -1.766844773 |
| 682.2353681 | 7.51150802 | 1.35538 | 7.38474E-05 | 1.496417044  | 499.2207496 | 9.67241361 | 1.56696 | 1.23638E-09 | 3.474053212  |
| 163.0749716 | 4.56681369 | 1.35436 | 7.36177E-05 | -2.370362816 | 500.9197652 | 0.66797613 | 1.2165  | 0.000677391 | 1.62330608   |
| 415.2332646 | 7.2659095  | 1.35347 | 7.71273E-05 | -0.973790615 | 501.1070025 | 7.68922278 | 1.51089 | 8.17026E-08 | 2.148583306  |
| 1005.096411 | 7.42540809 | 1.35059 | 7.96953E-05 | 0.993735816  | 501.2361566 | 7.99154749 | 1.26777 | 0.000184658 | -0.882062537 |



|             |            |         |             |              |             |            |         |             |              |
|-------------|------------|---------|-------------|--------------|-------------|------------|---------|-------------|--------------|
| 123.0810114 | 5.98780179 | 1.34882 | 8.7585E-05  | -0.87269715  | 504.1750432 | 6.69940382 | 1.25562 | 0.000488044 | 0.826130655  |
| 235.1690902 | 7.26896963 | 1.34858 | 8.56928E-05 | -0.926233192 | 504.1898373 | 6.36090245 | 1.55114 | 7.00554E-09 | 4.917370314  |
| 397.2221056 | 7.26681254 | 1.34798 | 8.69707E-05 | -0.905230587 | 505.1013025 | 6.98501042 | 1.37258 | 3.3704E-05  | -0.689003074 |
| 337.5737354 | 5.94219477 | 1.3478  | 8.97542E-05 | -0.470126779 | 506.1900948 | 4.60086209 | 1.09171 | 0.002697117 | -0.45628478  |
| 804.2884647 | 7.42551706 | 1.3436  | 9.17869E-05 | 1.003744117  | 506.1902275 | 4.32425552 | 1.31714 | 6.90667E-05 | -0.8830329   |
| 149.095722  | 5.99041331 | 1.34328 | 9.57808E-05 | -1.037772684 | 506.8806486 | 0.68130559 | 1.25025 | 0.000256476 | 1.055281571  |
| 379.186145  | 7.56237281 | 1.34319 | 0.000122527 | -0.634858168 | 508.1115804 | 9.95031098 | 1.36676 | 2.06652E-05 | 0.455444087  |
| 338.1784194 | 7.04953288 | 1.34237 | 9.38588E-05 | -0.948962538 | 511.1841219 | 8.33591718 | 1.31162 | 7.89657E-05 | -0.62637943  |
| 913.8187173 | 7.42414036 | 1.34082 | 9.70252E-05 | 0.98573568   | 513.1981745 | 7.75032256 | 1.19967 | 0.00064681  | -0.890145047 |
| 136.9353828 | 0.72498771 | 1.34034 | 0.000114328 | -0.805299976 | 513.2280032 | 8.65009151 | 1.07222 | 0.003648116 | 0.840198278  |
| 361.1750653 | 7.5625716  | 1.33997 | 0.000120833 | -0.630010314 | 515.1282507 | 1.00765555 | 1.43455 | 2.47807E-06 | -3.463652586 |
| 718.2292156 | 7.42553066 | 1.33858 | 0.000103031 | 1.050875623  | 515.1794504 | 6.19029161 | 1.2421  | 0.000398918 | 0.933661695  |
| 181.0494654 | 4.19566948 | 1.33849 | 0.000106209 | 0.915793618  | 516.1679818 | 4.1652815  | 1.13669 | 0.00206182  | 1.650912055  |
| 360.1639277 | 4.57025604 | 1.33785 | 0.000103802 | -2.236750469 | 516.8989768 | 0.66775553 | 1.39016 | 1.04087E-05 | 0.591506916  |
| 667.1890691 | 7.23619859 | 1.33761 | 0.000106062 | -1.217683385 | 517.2316003 | 8.97958836 | 1.5772  | 4.18219E-10 | 3.201808857  |
| 1042.849617 | 9.60299674 | 1.33733 | 0.000236146 | 1.716277375  | 518.1906171 | 8.59395708 | 1.32505 | 5.61193E-05 | -0.945496428 |
| 203.1791296 | 8.95920723 | 1.33492 | 0.000109531 | -1.305480248 | 519.1171967 | 8.35482969 | 1.04675 | 0.007571725 | 1.227916464  |
| 246.1812273 | 0.74403885 | 1.33323 | 0.000113055 | 0.673425545  | 519.1753098 | 6.81290839 | 1.04589 | 0.005568605 | -0.999504553 |
| 699.193366  | 7.41229538 | 1.33228 | 0.000116168 | 1.488649939  | 519.2465536 | 7.86909006 | 1.01344 | 0.006726264 | -1.133522565 |
| 455.114548  | 0.77764686 | 1.3322  | 0.000120316 | 0.755336768  | 519.2467826 | 8.06309074 | 1.32459 | 5.66155E-05 | -1.598163045 |
| 171.993117  | 0.68936603 | 1.33101 | 0.000141795 | -0.79443344  | 521.1109835 | 10.627237  | 1.03837 | 0.00510539  | 2.872765002  |
| 553.1888811 | 6.05006266 | 1.32966 | 0.000121519 | -0.789812347 | 522.1493476 | 6.08764796 | 1.39112 | 1.01204E-05 | 0.996000723  |
| 530.217991  | 5.89912159 | 1.32749 | 0.000141767 | -1.239026086 | 523.1149493 | 4.94747901 | 1.16754 | 0.001394652 | 0.975299928  |
| 321.0973208 | 7.30994345 | 1.32674 | 0.000174834 | 0.826645931  | 524.1101993 | 7.77448031 | 1.18828 | 0.000776019 | -0.994802419 |
| 1033.741329 | 7.72028792 | 1.32578 | 0.000133458 | 0.992889094  | 524.2007098 | 6.37954746 | 1.25077 | 0.000253382 | -1.003614723 |
| 963.2767345 | 8.21856113 | 1.32415 | 0.000148435 | 1.640558798  | 528.1597149 | 1.40687875 | 1.04748 | 0.00534792  | 0.779494838  |
| 614.1406839 | 5.94058137 | 1.32183 | 0.000147353 | -0.455621005 | 533.0959802 | 5.71637294 | 1.37087 | 2.4908E-05  | -1.163943218 |
| 319.0814048 | 6.53800928 | 1.32136 | 0.000192489 | -0.547510905 | 534.1855849 | 7.39453192 | 1.53414 | 1.85233E-08 | -0.682993095 |
| 217.1566983 | 7.05977022 | 1.32093 | 0.000143758 | -0.814229219 | 536.2007471 | 7.99084115 | 1.29567 | 0.00010991  | -0.476012564 |
| 828.3835227 | 7.06688597 | 1.32018 | 0.000162351 | -1.060607343 | 536.2049862 | 7.26545269 | 1.53242 | 2.36046E-08 | -1.861306337 |
| 948.424814  | 7.05219966 | 1.31955 | 0.000153538 | -1.756179927 | 537.1474286 | 3.7534711  | 1.45495 | 1.20277E-06 | -1.292369937 |
| 230.4232413 | 0.7048809  | 1.31574 | 0.000176742 | -1.182607462 | 537.1640397 | 8.52707947 | 1.12443 | 0.003042814 | 1.908167897  |
| 542.2527921 | 7.50531245 | 1.31483 | 0.000174703 | -1.045632632 | 539.2507053 | 8.82302199 | 1.07277 | 0.003419939 | 0.753906045  |
| 973.8040665 | 7.726825   | 1.31447 | 0.000163653 | 1.199083955  | 540.2410852 | 7.50225915 | 1.13219 | 0.001686023 | -0.9732717   |
| 849.2835551 | 7.65368106 | 1.31328 | 0.000166748 | 0.905895221  | 541.1635921 | 4.6005817  | 1.03174 | 0.005392512 | -0.322722388 |
| 561.217722  | 8.23756159 | 1.31315 | 0.000166664 | 0.860899441  | 543.2102487 | 9.67511313 | 1.55367 | 4.30202E-09 | 2.720086379  |
| 773.3929612 | 7.42686973 | 1.31302 | 0.000170855 | 1.063648505  | 544.2059417 | 8.78930007 | 1.46586 | 8.52276E-07 | -0.871744359 |
| 291.0419891 | 0.99326688 | 1.31048 | 0.000269866 | 2.003439521  | 544.7968501 | 0.70266276 | 1.07026 | 0.00349587  | -0.694038542 |

|             |            |         |             |              |             |            |         |             |              |
|-------------|------------|---------|-------------|--------------|-------------|------------|---------|-------------|--------------|
| 255.9439605 | 0.67547928 | 1.30996 | 0.000249782 | -0.866887299 | 545.1332864 | 8.28175154 | 1.55985 | 2.51221E-09 | 2.089906391  |
| 214.9175769 | 0.67532807 | 1.30925 | 0.000237151 | -1.009020478 | 546.2211224 | 8.89680232 | 1.32732 | 5.44874E-05 | -1.13933811  |
| 344.0890302 | 1.04050942 | 1.30843 | 0.000237597 | 0.710062627  | 547.111698  | 6.82351159 | 1.26512 | 0.000455421 | -0.507256009 |
| 695.2175963 | 9.11457812 | 1.30798 | 0.000230366 | 1.777823331  | 548.2367931 | 9.70192076 | 1.39322 | 1.07557E-05 | -2.000487784 |
| 678.2602772 | 7.41235167 | 1.30763 | 0.000184657 | 1.587727477  | 548.8532283 | 0.66827045 | 1.14372 | 0.001837654 | -0.813352542 |
| 143.9961655 | 0.69007716 | 1.30669 | 0.000236501 | -0.653021921 | 550.1452453 | 3.18929509 | 1.44105 | 2.0426E-06  | 1.70795817   |
| 474.8420083 | 0.67920036 | 1.30631 | 0.000212924 | -1.194738006 | 550.1797368 | 5.74253188 | 1.36657 | 2.00892E-05 | -0.782103108 |
| 307.9161    | 0.70452061 | 1.30619 | 0.000221693 | -0.89883171  | 551.2728437 | 4.81185433 | 1.03581 | 0.005745661 | 0.597949679  |
| 459.2221853 | 8.6682566  | 1.30568 | 0.00019131  | -1.31833532  | 554.8189784 | 0.69374003 | 1.29347 | 0.000115924 | -1.096171605 |
| 588.8210924 | 0.6769372  | 1.30513 | 0.000211834 | -1.331341858 | 559.2021594 | 7.32969422 | 1.48272 | 4.27735E-07 | 1.580900193  |
| 972.9923427 | 7.71983106 | 1.30285 | 0.00020164  | 0.933079357  | 560.7814969 | 0.70627741 | 1.28043 | 0.000145808 | -1.18613594  |
| 228.0500668 | 2.88790945 | 1.30172 | 0.000249599 | 0.495790807  | 561.2211321 | 8.99745271 | 1.56797 | 1.14902E-09 | 2.789783181  |
| 229.1512942 | 1.0403623  | 1.30149 | 0.000247707 | 0.444081804  | 562.1991842 | 8.33613397 | 1.49574 | 1.92148E-07 | -1.315409742 |
| 529.2184512 | 7.40832989 | 1.3013  | 0.000262737 | -1.53068751  | 562.2156817 | 7.98407523 | 1.43716 | 2.25799E-06 | -0.921125309 |
| 503.2030546 | 6.21225225 | 1.30083 | 0.000231542 | -1.511061925 | 563.1430786 | 7.21544127 | 1.5423  | 1.26407E-08 | -1.609585766 |
| 177.9628643 | 0.71365576 | 1.30061 | 0.000226144 | -0.503162561 | 564.3328491 | 11.8716243 | 1.13551 | 0.00198657  | 0.911623595  |
| 252.0865769 | 6.25926113 | 1.30024 | 0.00024394  | 0.817876775  | 564.8306151 | 0.66819347 | 1.25064 | 0.000279467 | -1.279472756 |
| 167.1062521 | 6.87693916 | 1.30023 | 0.000256338 | 0.737639221  | 565.1953645 | 7.4849598  | 1.14312 | 0.00142467  | -1.744785557 |
| 625.2131843 | 8.54944852 | 1.3001  | 0.000214728 | -1.021735688 | 565.215868  | 5.79518542 | 1.47032 | 6.10895E-07 | -0.778222079 |
| 396.1651173 | 3.54618986 | 1.2985  | 0.00024673  | -1.734103641 | 567.1856921 | 6.36437306 | 1.56476 | 2.43524E-09 | 4.12581954   |
| 382.6836852 | 3.76623479 | 1.29841 | 0.00038854  | 1.219107442  | 567.2831282 | 10.9775389 | 1.22038 | 0.000485326 | 1.328737383  |
| 125.9857307 | 0.67979172 | 1.29681 | 0.000316112 | -0.609957028 | 569.1576248 | 7.3926831  | 1.54393 | 9.25161E-09 | -0.877240789 |
| 766.2782484 | 6.61481834 | 1.29647 | 0.000227546 | 0.934280045  | 569.2250531 | 8.39261845 | 1.24764 | 0.000348303 | 1.308174996  |
| 319.1473501 | 1.04969847 | 1.2949  | 0.000331487 | 1.375258989  | 569.2984144 | 11.0942207 | 1.10504 | 0.002454849 | 1.099273321  |
| 607.2013481 | 8.52009681 | 1.29223 | 0.000255985 | 1.442884792  | 570.2172404 | 9.70773902 | 1.54552 | 9.35204E-09 | -2.750158564 |
| 543.2543331 | 4.00304746 | 1.29188 | 0.000251858 | 1.087932345  | 573.2215987 | 8.66023678 | 1.14318 | 0.001412121 | -2.793162854 |
| 161.0622437 | 5.75174128 | 1.29124 | 0.000268283 | -1.537694084 | 575.1430587 | 8.78265646 | 1.51763 | 5.55672E-08 | 2.036179215  |
| 652.2554301 | 5.34142982 | 1.28985 | 0.000264487 | 1.093973875  | 575.14344   | 8.3491932  | 1.54922 | 6.98232E-09 | 2.544820603  |
| 271.6301548 | 7.50344099 | 1.28955 | 0.000268637 | -0.938801304 | 577.2110796 | 7.70529022 | 1.36441 | 2.27546E-05 | 0.988871939  |
| 130.5260944 | 0.72703138 | 1.28828 | 0.000323072 | -0.748092452 | 578.1746877 | 6.19677175 | 1.09128 | 0.003443088 | 0.68562963   |
| 290.0756343 | 0.75496261 | 1.28653 | 0.00031956  | -1.252187659 | 580.1916181 | 6.40226649 | 1.52606 | 3.40347E-08 | 1.398244556  |
| 770.845735  | 7.93577656 | 1.2853  | 0.000277346 | -1.198843344 | 581.1674255 | 6.10825396 | 1.51516 | 6.34771E-08 | -1.520452345 |
| 362.1964423 | 6.89808481 | 1.28509 | 0.000293629 | -0.918916443 | 581.1963687 | 6.88686148 | 1.41567 | 4.77946E-06 | -1.394763736 |
| 874.1393799 | 7.4241773  | 1.28405 | 0.000291785 | 0.989945901  | 583.1246219 | 1.33505965 | 1.47069 | 6.00315E-07 | 1.764339852  |
| 167.0116702 | 0.6794222  | 1.28119 | 0.000411391 | -0.540937463 | 585.2184003 | 7.46012927 | 1.08428 | 0.003301705 | 0.620076736  |
| 223.1325899 | 7.18614759 | 1.28104 | 0.000313655 | 0.793679762  | 585.2935664 | 10.5054227 | 1.20615 | 0.000580578 | 1.162486939  |
| 442.2163384 | 1.04755352 | 1.27684 | 0.000426747 | 1.772681785  | 587.2577542 | 4.79908655 | 1.19921 | 0.000679835 | 1.135883671  |
| 309.0840461 | 0.9731832  | 1.2764  | 0.000339489 | 1.640715396  | 587.2582299 | 5.01279633 | 1.45667 | 1.0909E-06  | 1.112549835  |

|             |            |         |             |              |             |            |         |             |              |
|-------------|------------|---------|-------------|--------------|-------------|------------|---------|-------------|--------------|
| 113.0597071 | 5.99238699 | 1.27607 | 0.000341777 | -0.989014832 | 591.1960633 | 6.10971084 | 1.55346 | 4.27302E-09 | -2.023129336 |
| 156.0397051 | 0.69974988 | 1.27508 | 0.000406889 | 0.521506448  | 593.1321325 | 10.1461658 | 1.20263 | 0.000609708 | 1.801293027  |
| 344.8814209 | 0.67792388 | 1.27454 | 0.000436013 | -0.988112544 | 593.1518318 | 5.94422388 | 1.57669 | 6.00906E-10 | -0.684608132 |
| 547.3607297 | 14.0781396 | 1.27426 | 0.000354023 | -0.145435962 | 593.8740656 | 5.94187401 | 1.54611 | 1.39623E-08 | -0.734275824 |
| 200.0435136 | 0.73567509 | 1.27218 | 0.000380441 | -0.848734086 | 599.1191889 | 7.32766116 | 1.5346  | 2.08468E-08 | -1.558291947 |
| 659.1588492 | 5.30478606 | 1.27177 | 0.000441658 | -0.830985296 | 601.1397954 | 0.90521516 | 1.32449 | 5.67388E-05 | 1.055073623  |
| 220.8777522 | 0.70770154 | 1.27166 | 0.000373056 | -1.069880271 | 601.192863  | 5.79782862 | 1.53296 | 2.1793E-08  | -1.062847205 |
| 248.0736358 | 4.4067241  | 1.27043 | 0.000354608 | 1.004260354  | 603.1944323 | 7.32328412 | 1.41908 | 4.75092E-06 | 0.934847374  |
| 505.1321044 | 7.80450632 | 1.26858 | 0.000462848 | 1.821458373  | 603.2285526 | 5.64111012 | 1.50197 | 1.37286E-07 | 1.603871284  |
| 105.4734971 | 0.68211115 | 1.26586 | 0.000444244 | -0.984546403 | 605.1537232 | 8.24065455 | 1.61317 | 1.60941E-12 | 2.280234907  |
| 699.3559797 | 11.3044246 | 1.26531 | 0.000452086 | 1.523007054  | 607.1705905 | 8.0752602  | 1.32749 | 5.635E-05   | 1.781625464  |
| 795.3767686 | 5.99168313 | 1.26514 | 0.000422359 | -1.581548737 | 607.173797  | 8.7180878  | 1.18332 | 0.00083013  | 1.52624027   |
| 284.0968287 | 1.04789027 | 1.26409 | 0.000394472 | 0.641393431  | 607.2112207 | 1.64889363 | 1.23501 | 0.000358133 | 1.109629961  |
| 557.1198874 | 1.12793622 | 1.26334 | 0.000417804 | -0.542085127 | 608.1859053 | 6.10765256 | 1.52875 | 2.7005E-08  | -1.497739456 |
| 722.8178259 | 8.03088797 | 1.26309 | 0.000414888 | -1.445807304 | 609.1482251 | 7.39707643 | 1.3228  | 8.2762E-05  | 1.045461357  |
| 428.2069662 | 1.04411342 | 1.26231 | 0.000439222 | 2.133335784  | 609.9467967 | 8.15544748 | 1.05157 | 0.004536797 | 0.409164291  |
| 514.2136415 | 5.83549275 | 1.26229 | 0.000472565 | 2.204564973  | 610.200938  | 7.47885293 | 1.45324 | 1.23112E-06 | -0.992109724 |
| 353.2685284 | 11.3045159 | 1.26192 | 0.000520304 | 1.338356718  | 611.14721   | 0.98228584 | 1.44004 | 2.0522E-06  | 1.368648163  |
| 549.1247028 | 8.05585562 | 1.26118 | 0.000650066 | -0.466282558 | 611.1636726 | 4.94612682 | 1.09001 | 0.003179846 | 0.419503098  |
| 499.1225762 | 6.08891894 | 1.25798 | 0.00043518  | 0.690736704  | 611.2211676 | 5.79738255 | 1.4798  | 4.28144E-07 | -0.883353953 |
| 957.2852203 | 7.42370406 | 1.25797 | 0.000444626 | 0.936031493  | 613.0226969 | 1.16525803 | 1.55203 | 4.7636E-09  | -2.247261062 |
| 534.2183899 | 6.19707582 | 1.25653 | 0.0004593   | 0.719218592  | 613.2143653 | 6.80359295 | 1.05572 | 0.00451325  | -1.185994122 |
| 233.1170927 | 7.05903518 | 1.25563 | 0.000484163 | -0.822838083 | 613.2158154 | 7.25536842 | 1.04054 | 0.005251403 | -1.135533226 |
| 461.1269424 | 5.1139004  | 1.25352 | 0.000507041 | 2.689389313  | 615.2648033 | 8.77573632 | 1.06413 | 0.004008591 | -0.803908768 |
| 441.173564  | 7.96735805 | 1.25279 | 0.000824732 | 0.783728275  | 616.3265622 | 5.85201319 | 1.17667 | 0.000931903 | 2.589949475  |
| 445.0864504 | 0.7455717  | 1.25141 | 0.000567141 | -1.241357765 | 617.2457474 | 8.40206686 | 1.21456 | 0.000490503 | 0.754479012  |
| 365.1206195 | 4.56351987 | 1.25103 | 0.000495982 | -2.306370672 | 619.2630909 | 8.98663384 | 1.50307 | 1.27351E-07 | 3.196603378  |
| 518.1803169 | 4.17176889 | 1.25037 | 0.000593203 | 1.62558245   | 621.1478255 | 7.25382156 | 1.00809 | 0.014983479 | 1.160352485  |
| 124.0360098 | 1.04074115 | 1.24906 | 0.00101984  | 0.816871238  | 623.1639926 | 6.18499955 | 1.16341 | 0.001367164 | 0.720305831  |
| 540.8836068 | 0.673816   | 1.24881 | 0.00056722  | 1.067576356  | 623.1642392 | 6.38773826 | 1.42453 | 5.97244E-06 | -0.798813392 |
| 426.1969723 | 8.47051296 | 1.24845 | 0.000535153 | 4.214763002  | 625.1798353 | 6.22639232 | 1.18608 | 0.00117134  | -0.894530068 |
| 453.2062015 | 8.4606875  | 1.24815 | 0.000508792 | -1.580892646 | 625.180557  | 5.78743028 | 1.12254 | 0.003240937 | -0.380120288 |
| 785.2146661 | 6.43024062 | 1.24754 | 0.000513685 | 1.076539265  | 626.1385362 | 7.3296111  | 1.41651 | 5.80183E-06 | -1.821724787 |
| 685.7972292 | 7.47257684 | 1.24695 | 0.000519036 | 4.513913239  | 627.1228795 | 5.10232969 | 1.17059 | 0.001001424 | -0.796036467 |
| 751.8714903 | 7.93827965 | 1.24658 | 0.000528666 | -1.276341238 | 627.2090851 | 7.05892155 | 1.25143 | 0.000263117 | -0.678415979 |
| 615.2264455 | 7.06618087 | 1.24556 | 0.000579849 | -0.670463357 | 628.2114517 | 5.79683578 | 1.48811 | 3.06094E-07 | -1.117768894 |
| 519.2646918 | 7.81031122 | 1.24525 | 0.001095209 | -0.661904283 | 629.1299005 | 7.09818205 | 1.54067 | 1.70085E-08 | -1.76813097  |
| 450.8768614 | 0.67872371 | 1.24257 | 0.000659351 | -1.058429294 | 630.8762871 | 0.66778874 | 1.24481 | 0.000355753 | 1.031937659  |

|             |            |         |             |              |             |            |         |             |              |
|-------------|------------|---------|-------------|--------------|-------------|------------|---------|-------------|--------------|
| 223.132566  | 5.75132824 | 1.24207 | 0.00065154  | -0.486847897 | 633.2060802 | 7.90651558 | 1.42883 | 3.12226E-06 | -0.73712781  |
| 290.1021023 | 4.58236766 | 1.24055 | 0.000662304 | -0.782951533 | 633.2425626 | 8.34912611 | 1.41898 | 4.23904E-06 | -1.120260781 |
| 208.0966997 | 5.38525639 | 1.24011 | 0.000605686 | -0.76818132  | 635.254614  | 7.06167947 | 1.31928 | 6.61501E-05 | 1.078870479  |
| 628.2006754 | 6.20271225 | 1.23871 | 0.000774114 | -1.552549782 | 637.1862975 | 0.89875821 | 1.54353 | 9.4607E-09  | 1.36752957   |
| 591.1825153 | 4.00669299 | 1.2356  | 0.001706875 | -0.681263281 | 637.2370357 | 7.04973114 | 1.03839 | 0.0050359   | -1.088622691 |
| 519.1690925 | 5.83349237 | 1.23423 | 0.000676382 | 1.846169389  | 647.2931006 | 8.82207718 | 1.11895 | 0.002405381 | -0.944341063 |
| 402.1581755 | 4.45971537 | 1.23379 | 0.000638721 | -0.856340963 | 649.1038608 | 5.09772641 | 1.39093 | 1.16188E-05 | -1.187416543 |
| 771.2341596 | 7.14893263 | 1.23378 | 0.000672261 | 1.015193246  | 651.2162837 | 6.90932638 | 1.28015 | 0.000146831 | -0.904918345 |
| 477.1008555 | 5.11105396 | 1.23295 | 0.000740662 | 2.840510481  | 652.2178747 | 6.96162779 | 1.2455  | 0.000308065 | -1.422600067 |
| 724.260042  | 6.94295906 | 1.23226 | 0.0006521   | 1.926423341  | 653.1391963 | 7.21482901 | 1.46131 | 1.66494E-06 | -1.855546679 |
| 282.2787093 | 14.2712786 | 1.23125 | 0.000660205 | -0.929301259 | 653.1783579 | 7.97917803 | 1.45343 | 1.22591E-06 | 1.815132617  |
| 330.1490906 | 1.01522747 | 1.23098 | 0.000701707 | 0.757806862  | 654.2270584 | 7.0589364  | 1.19756 | 0.00069663  | -0.637653023 |
| 1034.602169 | 7.72661753 | 1.23035 | 0.000674463 | 0.949236124  | 655.2297886 | 8.67470249 | 1.21705 | 0.000466322 | 0.836025597  |
| 704.1912107 | 6.22800417 | 1.22986 | 0.000940697 | -0.548232437 | 655.2972781 | 8.06013351 | 1.06736 | 0.00466993  | 0.822256894  |
| 458.8576458 | 0.67404216 | 1.22839 | 0.001000702 | -0.998304434 | 656.1481708 | 7.0845968  | 1.49108 | 2.91478E-07 | -1.614594387 |
| 275.0761512 | 3.69357648 | 1.22783 | 0.000931206 | -0.852646578 | 659.2219824 | 7.40807932 | 1.21434 | 0.000567216 | 1.885665206  |
| 309.1327085 | 6.13673132 | 1.22701 | 0.000715004 | -0.51567753  | 662.8334054 | 0.66786138 | 1.12873 | 0.002150112 | -0.708616692 |
| 471.3858101 | 0.67361864 | 1.22384 | 0.001012418 | -1.165460085 | 666.2263153 | 5.64120235 | 1.4847  | 3.20433E-07 | 1.004256736  |
| 169.1219803 | 6.39247323 | 1.22155 | 0.000766254 | -0.728133989 | 667.2616609 | 7.80907856 | 1.09074 | 0.002941167 | -2.836156502 |
| 669.2728014 | 8.82015264 | 1.22089 | 0.000813713 | -1.033631788 | 669.2056916 | 8.54827007 | 1.24595 | 0.00027644  | -0.944418921 |
| 211.0963427 | 3.39312307 | 1.21987 | 0.000846602 | 0.870141355  | 673.2406905 | 8.67695989 | 1.39187 | 9.91364E-06 | 1.35859747   |
| 394.9760874 | 0.7416549  | 1.21854 | 0.000826296 | 0.476152422  | 678.8111618 | 0.66791875 | 1.16162 | 0.001152066 | -1.020850911 |
| 286.091631  | 1.69843159 | 1.21432 | 0.001080427 | 0.770725548  | 679.195795  | 0.92771745 | 1.3381  | 4.32257E-05 | 1.801023526  |
| 185.9623865 | 0.70077    | 1.21183 | 0.000930645 | -0.767528131 | 681.278032  | 8.38776758 | 1.17207 | 0.000921229 | -2.571918247 |
| 526.2343822 | 8.79945046 | 1.20851 | 0.001365132 | -2.340600285 | 683.2931459 | 8.26720274 | 1.11107 | 0.002236763 | -3.348743184 |
| 353.1711407 | 1.3839189  | 1.20571 | 0.001098977 | -0.798032081 | 685.1272546 | 3.4510223  | 1.05942 | 0.003971785 | -0.973825561 |
| 370.17091   | 4.11160356 | 1.20227 | 0.001066637 | 1.998846402  | 687.2885984 | 5.95315154 | 1.15644 | 0.001317751 | 1.235091702  |
| 167.0466753 | 4.40595552 | 1.20156 | 0.001072067 | 1.173105081  | 688.1746476 | 6.21719039 | 1.14033 | 0.002748131 | -0.536927094 |
| 787.2296605 | 5.88129038 | 1.19902 | 0.001053838 | 0.683713196  | 689.2306902 | 6.45451674 | 1.39406 | 1.04138E-05 | 0.987129209  |
| 108.45167   | 0.70690896 | 1.19867 | 0.001093666 | -1.077207815 | 691.1203379 | 5.94970506 | 1.03659 | 0.005372181 | -0.269759129 |
| 278.0750794 | 6.18945968 | 1.19827 | 0.00106671  | 0.693049765  | 695.2717082 | 8.0550772  | 1.052   | 0.005246015 | 0.650487781  |
| 303.1916625 | 0.84553901 | 1.19411 | 0.001296267 | -0.439622116 | 697.3668126 | 11.4342679 | 1.25307 | 0.000291858 | 1.414580603  |
| 426.1970746 | 8.30840141 | 1.19387 | 0.001201322 | 4.072023537  | 698.214665  | 5.74742794 | 1.40803 | 6.13794E-06 | -2.304467207 |
| 467.2022534 | 5.03645876 | 1.19284 | 0.001175181 | -1.9009591   | 699.1438278 | 4.91751912 | 1.06257 | 0.00602989  | -0.505340884 |
| 403.2186485 | 4.87595949 | 1.19262 | 0.001726778 | -0.808517613 | 705.2634699 | 9.19484019 | 1.59193 | 9.22312E-11 | 3.73407549   |
| 443.1483615 | 7.12812968 | 1.19259 | 0.001404208 | -1.36468895  | 707.1848086 | 7.73987469 | 1.17398 | 0.001504691 | -0.711331772 |
| 624.2691962 | 7.80094372 | 1.19151 | 0.001201534 | -0.860427003 | 709.1640368 | 6.4441063  | 1.24248 | 0.000340153 | -0.447365862 |
| 382.9307085 | 0.68033964 | 1.19105 | 0.001316429 | 1.191378986  | 709.2719976 | 8.61381165 | 1.38588 | 1.22768E-05 | 1.235125314  |

|             |            |         |             |              |             |            |         |             |              |
|-------------|------------|---------|-------------|--------------|-------------|------------|---------|-------------|--------------|
| 297.0607991 | 5.10179749 | 1.19045 | 0.001444429 | -0.742023598 | 709.3569489 | 7.04968687 | 1.36683 | 2.00987E-05 | -1.763953585 |
| 335.1335809 | 4.11117794 | 1.19014 | 0.001315381 | 2.166624249  | 713.158942  | 4.88758623 | 1.39967 | 1.08241E-05 | 1.378417133  |
| 697.2843318 | 8.06352712 | 1.18979 | 0.001266125 | 0.841486738  | 713.2313627 | 5.11075665 | 1.19721 | 0.000631064 | 0.507288637  |
| 448.2542211 | 5.9967588  | 1.18911 | 0.001404254 | -0.631262754 | 714.2627595 | 8.13367137 | 1.09596 | 0.002651003 | -2.341164884 |
| 389.1433047 | 5.15871518 | 1.18806 | 0.00145282  | -1.031928037 | 721.1243894 | 4.91613337 | 1.1227  | 0.002293819 | -0.768241303 |
| 394.1644776 | 3.25723718 | 1.18767 | 0.001433865 | 2.425203159  | 721.3667479 | 11.3052646 | 1.26514 | 0.000227633 | 1.433592649  |
| 507.7775393 | 5.72658373 | 1.18711 | 0.001340987 | -1.927486603 | 723.2731644 | 8.6251593  | 1.48238 | 3.50334E-07 | 2.777286013  |
| 187.1099675 | 6.12993064 | 1.18663 | 0.001265732 | -0.541528022 | 723.3820807 | 11.7467947 | 1.36115 | 2.97445E-05 | 2.270243006  |
| 198.0526327 | 0.79266333 | 1.18579 | 0.001366866 | -0.661687135 | 725.1955251 | 5.74337722 | 1.31819 | 9.41598E-05 | -0.845883843 |
| 360.1476373 | 4.29817291 | 1.18548 | 0.001764105 | -0.75547489  | 725.1961019 | 5.31444543 | 1.38515 | 1.332E-05   | -1.388373585 |
| 377.0456585 | 0.93676569 | 1.18467 | 0.002123012 | 1.097635072  | 725.397551  | 12.2784408 | 1.43965 | 4.28784E-06 | 2.545419183  |
| 330.5842717 | 7.90716255 | 1.18419 | 0.002008444 | -0.429001834 | 727.1771945 | 5.55994562 | 1.30278 | 9.96256E-05 | 1.167453676  |
| 535.1428199 | 5.83592486 | 1.1825  | 0.001545015 | 2.710840262  | 729.3354541 | 5.98281421 | 1.10462 | 0.002913707 | -0.821470705 |
| 204.9039935 | 0.70617295 | 1.18225 | 0.001384074 | -0.537527833 | 730.2575293 | 7.80250251 | 1.14857 | 0.001376886 | -2.472845216 |
| 1055.498144 | 9.60265975 | 1.18171 | 0.00291922  | 1.63417839   | 733.2939904 | 8.97787486 | 1.51832 | 6.28967E-08 | -1.755536394 |
| 512.8945646 | 0.67484165 | 1.18151 | 0.001360199 | 0.94356753   | 735.1401634 | 4.88232248 | 1.4613  | 8.96151E-07 | 1.377254669  |
| 431.1526284 | 8.47585868 | 1.18141 | 0.001426163 | 3.29960709   | 735.2213329 | 1.25298452 | 1.53278 | 2.04204E-08 | 1.24358996   |
| 392.1317138 | 5.38210215 | 1.18061 | 0.001638236 | -1.342965397 | 737.2381453 | 0.95057026 | 1.00903 | 0.007005216 | 0.591924368  |
| 401.0867957 | 8.9279196  | 1.17977 | 0.001550254 | 1.17539226   | 737.2722859 | 8.4014559  | 1.17895 | 0.000864388 | -1.591016054 |
| 531.2429354 | 7.70360224 | 1.17947 | 0.001389928 | -0.349412979 | 737.287086  | 6.76523894 | 1.46648 | 7.26999E-07 | 1.484995856  |
| 221.1169295 | 5.11129527 | 1.1791  | 0.001495665 | 0.398896912  | 738.3567687 | 11.3052646 | 1.27295 | 0.00019651  | 1.480972508  |
| 193.0856298 | 7.15839084 | 1.17803 | 0.001973349 | 0.667600035  | 739.2110653 | 7.05822442 | 1.35467 | 3.17213E-05 | 1.191810114  |
| 337.9689828 | 0.67404897 | 1.17756 | 0.001725361 | 1.222341348  | 741.2611816 | 6.84173442 | 1.23831 | 0.000328228 | -2.106510169 |
| 1051.382197 | 6.43281116 | 1.17651 | 0.001479037 | -1.035492178 | 743.2092904 | 8.14504968 | 1.12104 | 0.001864404 | 0.778764174  |
| 237.0870358 | 1.4196596  | 1.17605 | 0.001532791 | -0.609750353 | 743.3134816 | 8.62339721 | 1.18011 | 0.00090886  | 2.501339409  |
| 795.2315459 | 7.00632416 | 1.17585 | 0.002307845 | 0.623493836  | 744.856154  | 0.66757338 | 1.24107 | 0.000420602 | 2.011159258  |
| 484.203072  | 7.80142807 | 1.17497 | 0.001726505 | 1.871132677  | 749.8576761 | 7.9455194  | 1.1223  | 0.001838625 | -1.07597596  |
| 871.2499034 | 7.42360502 | 1.17149 | 0.001874599 | -0.558044107 | 751.195308  | 5.11774141 | 1.18102 | 0.000961795 | 3.484390508  |
| 209.1452435 | 7.81769842 | 1.16911 | 0.001685705 | -1.066501506 | 755.2059987 | 6.54412167 | 1.56332 | 1.8038E-09  | 2.103782499  |
| 500.1699472 | 6.88432352 | 1.16884 | 0.001628518 | -1.078716405 | 759.2354717 | 6.23117542 | 1.0074  | 0.007013877 | -0.592205956 |
| 462.2332966 | 4.60257797 | 1.16786 | 0.001657927 | -0.5405315   | 761.1717327 | 5.74670125 | 1.3932  | 1.60938E-05 | -0.820149388 |
| 267.6375128 | 4.10559547 | 1.16523 | 0.001699864 | 1.620125794  | 763.1873805 | 8.04010237 | 1.24999 | 0.000303117 | -0.504257471 |
| 362.0937091 | 0.93175898 | 1.16232 | 0.002013735 | -1.137430134 | 765.1924118 | 6.88076993 | 1.0347  | 0.00655452  | 0.888015283  |
| 258.1439436 | 1.5259923  | 1.16229 | 0.001843097 | 0.676074956  | 766.2270956 | 0.86368005 | 1.46697 | 8.69173E-07 | 2.921708072  |
| 507.8690604 | 0.67412309 | 1.16214 | 0.002031989 | -0.876254743 | 766.250159  | 6.67649837 | 1.10908 | 0.002223354 | 0.938104543  |
| 401.1421514 | 8.70912255 | 1.16053 | 0.003433693 | 2.006274338  | 768.2039478 | 6.62951457 | 1.41825 | 4.5796E-06  | 1.350128171  |
| 208.0967522 | 6.48064165 | 1.15964 | 0.002454558 | 0.483878969  | 769.2395081 | 7.15035739 | 1.35498 | 3.14675E-05 | 1.257886084  |
| 130.0495999 | 1.20658961 | 1.1593  | 0.001790757 | 0.732913304  | 771.1645224 | 4.93641073 | 1.00317 | 0.007336808 | -1.137981865 |

|             |            |         |             |              |             |            |         |             |              |
|-------------|------------|---------|-------------|--------------|-------------|------------|---------|-------------|--------------|
| 253.1795049 | 7.64191189 | 1.15831 | 0.001931483 | -0.940184626 | 771.1646451 | 4.50148761 | 1.10434 | 0.003894566 | 0.636393841  |
| 364.702925  | 9.20529883 | 1.15709 | 0.002313974 | -0.76933267  | 771.1648521 | 4.69893862 | 1.19387 | 0.000893268 | -1.137547793 |
| 404.1527466 | 3.29279675 | 1.15708 | 0.005059759 | 0.435579882  | 771.2012016 | 5.16789866 | 1.50888 | 8.98546E-08 | 1.191186151  |
| 406.4033301 | 0.67428195 | 1.15699 | 0.002437849 | -0.97516321  | 776.2724979 | 7.98288149 | 1.06938 | 0.003590759 | -1.059509645 |
| 513.230512  | 7.69802913 | 1.15519 | 0.001891884 | -0.456286512 | 776.3506309 | 7.74785913 | 1.48503 | 3.868E-07   | -1.991947193 |
| 555.1487923 | 6.19201262 | 1.15413 | 0.002007061 | 0.480060385  | 777.2832928 | 7.50927753 | 1.05612 | 0.004361753 | 0.646495619  |
| 255.1223395 | 5.14498999 | 1.15399 | 0.001949309 | 0.31619021   | 779.2478706 | 1.84428971 | 1.51838 | 5.49765E-08 | 2.085080061  |
| 386.1092385 | 6.66566219 | 1.15365 | 0.001937841 | -0.850284834 | 780.2508866 | 1.59433521 | 1.53496 | 1.75908E-08 | 2.909627766  |
| 546.2127293 | 5.16041512 | 1.15308 | 0.001939645 | -1.441595587 | 783.2339444 | 6.43013816 | 1.1871  | 0.000778067 | 0.832344577  |
| 255.1932415 | 7.04024905 | 1.15304 | 0.001962014 | -0.848510465 | 783.2363878 | 6.99465877 | 1.02164 | 0.006752034 | 0.596229514  |
| 414.1783242 | 3.55049002 | 1.15216 | 0.001960959 | 1.202296791  | 785.1798944 | 5.50248579 | 1.10635 | 0.003759783 | 0.768281146  |
| 548.2340065 | 6.05006266 | 1.15121 | 0.001983148 | -0.494007477 | 785.2167882 | 5.87815175 | 1.16859 | 0.001134129 | 0.791514101  |
| 917.1130315 | 8.2951295  | 1.1501  | 0.002244316 | -0.901957298 | 793.2259935 | 6.13005433 | 1.4109  | 6.44252E-06 | 0.872534667  |
| 503.1912423 | 7.4867181  | 1.14867 | 0.002106783 | -2.01787679  | 795.2002191 | 7.04366244 | 1.57064 | 8.63345E-10 | 2.613779025  |
| 481.2181541 | 5.15239562 | 1.14839 | 0.002298565 | -1.066203877 | 796.2187773 | 4.28592638 | 1.09033 | 0.003324639 | 0.649365594  |
| 143.1064206 | 8.31319932 | 1.14796 | 0.002312182 | 4.344457361  | 799.19547   | 5.56082751 | 1.2515  | 0.000295778 | 1.644312621  |
| 529.2396645 | 4.03023015 | 1.14736 | 0.003864888 | -0.688892501 | 802.2078319 | 7.06060133 | 1.30241 | 0.000103309 | 1.022186565  |
| 220.1179231 | 2.99776011 | 1.1473  | 0.002102629 | 0.405696116  | 805.2011303 | 7.14196256 | 1.47791 | 4.95804E-07 | 0.983750372  |
| 572.8392628 | 0.6736878  | 1.14578 | 0.003234103 | -0.839597296 | 805.3243135 | 9.02663785 | 1.06717 | 0.003951059 | 0.597446557  |
| 362.1973592 | 5.21755732 | 1.1457  | 0.002235243 | -1.001239846 | 807.1768656 | 5.16789866 | 1.44748 | 1.5374E-06  | 0.873794142  |
| 502.2321975 | 8.04413663 | 1.14508 | 0.002245884 | -1.12721097  | 807.3306517 | 6.7334999  | 1.43683 | 2.8654E-06  | -1.531258985 |
| 182.9627049 | 0.68128596 | 1.14334 | 0.002223807 | 0.380875287  | 808.7689482 | 0.66832753 | 1.21691 | 0.000492016 | -1.380130103 |
| 533.1543007 | 0.92843453 | 1.14179 | 0.002343499 | -2.422846202 | 811.3036865 | 7.58372567 | 1.07584 | 0.003264196 | 0.451947959  |
| 463.0663045 | 5.52960439 | 1.14106 | 0.002552031 | 3.670826667  | 821.1921192 | 5.87798788 | 1.16824 | 0.001028995 | 0.6180118    |
| 609.1816815 | 8.07188836 | 1.13948 | 0.002327697 | 1.188589746  | 823.2164589 | 4.98982201 | 1.16522 | 0.001045016 | 4.657675825  |
| 919.9834372 | 6.43443922 | 1.13921 | 0.002385107 | -0.95194566  | 829.4227563 | 9.1285928  | 1.19222 | 0.000686189 | 0.674090892  |
| 908.1062865 | 7.99119173 | 1.13853 | 0.002562278 | -0.822363608 | 831.2444807 | 5.99789087 | 1.38024 | 1.39479E-05 | 0.987913095  |
| 459.1290251 | 5.86929946 | 1.1384  | 0.002402673 | 0.353698542  | 832.216307  | 7.14311409 | 1.467   | 8.19307E-07 | 0.996682137  |
| 526.7911188 | 6.6059695  | 1.13772 | 0.002390525 | 0.998366439  | 833.2747864 | 7.3055782  | 1.52896 | 2.76252E-08 | 2.313385268  |
| 478.1385633 | 0.98520429 | 1.13738 | 0.002358259 | 0.977195712  | 834.1951789 | 5.17354222 | 1.5142  | 6.70607E-08 | 1.056150525  |
| 689.2622237 | 4.98011527 | 1.13738 | 0.003387529 | -0.537223706 | 835.2091905 | 0.96263881 | 1.09193 | 0.002734104 | 0.64451292   |
| 439.1236595 | 6.58409177 | 1.13692 | 0.002420346 | -0.980508719 | 835.2893645 | 6.15687708 | 1.17687 | 0.001181495 | 0.6857836    |
| 456.1714426 | 5.11891424 | 1.13682 | 0.003026437 | 3.798062465  | 835.3611401 | 7.94349157 | 1.33024 | 5.32221E-05 | 2.805838846  |
| 750.3797202 | 9.20529883 | 1.13625 | 0.003598408 | -0.445470354 | 841.350882  | 7.72595434 | 1.44819 | 1.66246E-06 | -1.628397674 |
| 686.3024847 | 7.81040095 | 1.13622 | 0.002516718 | -2.995621226 | 843.3294999 | 5.9861966  | 1.14413 | 0.001437369 | -0.904200932 |
| 578.3295454 | 5.52974682 | 1.13566 | 0.002804687 | 3.537583924  | 845.2787457 | 0.83910373 | 1.39288 | 9.80272E-06 | 1.21055407   |
| 312.1654749 | 4.40345192 | 1.13489 | 0.002916454 | 1.731226503  | 845.3334064 | 6.71962178 | 1.54153 | 1.09741E-08 | -1.225899966 |
| 440.148476  | 6.53035676 | 1.13253 | 0.00356845  | 1.956470536  | 847.2518514 | 7.01025858 | 1.03173 | 0.00603784  | 0.729565827  |

|             |            |         |             |              |             |            |         |             |              |
|-------------|------------|---------|-------------|--------------|-------------|------------|---------|-------------|--------------|
| 211.0962939 | 3.18238379 | 1.13242 | 0.002556754 | 0.937816147  | 848.2106909 | 5.87904735 | 1.07558 | 0.003494047 | 0.595378148  |
| 341.1380434 | 7.48465484 | 1.13105 | 0.002565549 | -1.996466695 | 849.2581812 | 7.13394419 | 1.21071 | 0.000550182 | 1.929267784  |
| 296.9567621 | 0.67361864 | 1.13031 | 0.002590377 | 0.506086239  | 851.2986347 | 8.17082449 | 1.20059 | 0.000782277 | 2.861896186  |
| 384.1965614 | 1.04509033 | 1.12924 | 0.003291677 | 2.937357747  | 857.3664707 | 7.26439341 | 1.0156  | 0.007005236 | -0.717768755 |
| 369.926017  | 0.67568619 | 1.12858 | 0.004465567 | -0.596443671 | 860.231544  | 6.46006378 | 1.4344  | 2.52603E-06 | 1.26210663   |
| 317.1207866 | 4.40691793 | 1.12809 | 0.003013011 | 1.579801483  | 866.2580285 | 7.0868367  | 1.30725 | 8.58466E-05 | 1.546613168  |
| 446.187282  | 0.84005566 | 1.12666 | 0.003344866 | 1.088332346  | 869.2364662 | 5.86782643 | 1.38293 | 2.00376E-05 | -0.707319005 |
| 242.0810505 | 4.60460056 | 1.12618 | 0.002753186 | -0.548224232 | 874.8110437 | 0.66732764 | 1.36015 | 2.4067E-05  | 1.159581741  |
| 468.6893099 | 8.40273938 | 1.12593 | 0.003795456 | 0.60695471   | 877.3347108 | 9.15071026 | 1.13671 | 0.00175944  | -1.051683173 |
| 289.0889641 | 1.66518102 | 1.12499 | 0.004260655 | 0.774069724  | 883.1844179 | 5.87089871 | 1.42887 | 3.10402E-06 | 0.868843912  |
| 520.3399673 | 11.8705113 | 1.12414 | 0.005480324 | 0.825928581  | 883.418682  | 10.8843346 | 1.38589 | 1.2841E-05  | 2.242060951  |
| 317.1207189 | 4.81191284 | 1.12165 | 0.003265428 | -0.334755322 | 887.3335097 | 5.81506307 | 1.36575 | 2.17491E-05 | -1.394166008 |
| 193.0857198 | 6.19201262 | 1.12133 | 0.002950905 | 0.499834154  | 887.3920703 | 4.6005016  | 1.41767 | 4.58903E-06 | -1.194232901 |
| 398.1069002 | 8.9008674  | 1.12076 | 0.003941596 | -0.624111255 | 887.4277614 | 7.26243471 | 1.40447 | 6.90459E-06 | -2.244638723 |
| 105.0335585 | 5.10074982 | 1.12067 | 0.003596004 | -0.795312701 | 889.3364274 | 6.11730472 | 1.54654 | 8.52235E-09 | -2.190057569 |
| 816.4725641 | 6.1502287  | 1.11943 | 0.002916705 | -0.999764181 | 896.409809  | 8.40407979 | 1.40662 | 6.32251E-06 | 0.894827243  |
| 428.1924904 | 4.51367452 | 1.11872 | 0.002993718 | -0.586970102 | 903.2983687 | 7.42759105 | 1.46128 | 9.37227E-07 | -2.056798346 |
| 384.1151228 | 3.22989499 | 1.11869 | 0.003404465 | 0.916734897  | 905.2941623 | 4.97103046 | 1.42984 | 3.96317E-06 | 1.595587115  |
| 746.9160555 | 6.74607415 | 1.11852 | 0.003028689 | -1.591705257 | 909.3727775 | 4.59806679 | 1.2782  | 0.000155979 | -0.943158154 |
| 668.193146  | 7.23823706 | 1.11803 | 0.004710106 | 1.528922929  | 911.3924167 | 8.59698783 | 1.14598 | 0.001382003 | -1.744143718 |
| 382.1968867 | 1.05470929 | 1.1179  | 0.004331398 | 1.974412372  | 913.2669517 | 7.75354802 | 1.08597 | 0.005324453 | 1.400656087  |
| 374.1575814 | 7.76080807 | 1.11783 | 0.003592229 | -0.597789935 | 919.252842  | 7.31354094 | 1.32786 | 5.2965E-05  | -0.972001721 |
| 767.2038917 | 6.88421018 | 1.11744 | 0.003313341 | 1.056429685  | 927.2468461 | 1.23737451 | 1.51739 | 6.22825E-08 | -1.952383493 |
| 329.1480576 | 5.61121733 | 1.1171  | 0.003497067 | -0.301368778 | 927.2477073 | 1.0287884  | 1.19513 | 0.000654442 | -0.814641644 |
| 370.0932508 | 4.92326519 | 1.11701 | 0.003551415 | -0.690668004 | 931.2518189 | 7.31746832 | 1.42853 | 3.46966E-06 | 1.670155414  |
| 439.1443618 | 5.1151073  | 1.11695 | 0.003856623 | 3.200009813  | 931.2729062 | 5.05184732 | 1.48924 | 2.61197E-07 | 2.668809339  |
| 113.0344019 | 1.20658961 | 1.1165  | 0.003036792 | 0.500260066  | 932.3861266 | 8.40177164 | 1.33698 | 4.3485E-05  | 1.098964608  |
| 223.989149  | 0.68185646 | 1.11574 | 0.003077935 | 0.363674644  | 933.359697  | 7.0370892  | 1.1129  | 0.002371931 | -0.802541214 |
| 249.0449    | 0.73257742 | 1.11343 | 0.003975814 | 0.19819778   | 937.3350488 | 8.11934301 | 1.02082 | 0.007641693 | 0.601876865  |
| 701.2262996 | 5.59220181 | 1.11318 | 0.00408223  | 0.341394938  | 943.3822993 | 7.38794069 | 1.55989 | 2.73295E-09 | -2.132512729 |
| 305.0541418 | 1.04755352 | 1.11314 | 0.004023053 | 0.788695289  | 946.4108982 | 7.05165671 | 1.35364 | 2.84605E-05 | -1.667861302 |
| 376.1758965 | 8.19559217 | 1.11309 | 0.003495686 | 0.607864221  | 947.2478255 | 8.02887919 | 1.42638 | 3.33591E-06 | 1.854693178  |
| 741.2234286 | 6.24640762 | 1.11149 | 0.003479918 | -0.721263102 | 948.3340122 | 7.06001383 | 1.55938 | 2.82341E-09 | -2.417330158 |
| 165.0543641 | 5.13606959 | 1.11017 | 0.0041255   | 0.838682071  | 951.2782169 | 6.73179378 | 1.33342 | 6.50278E-05 | -1.096029943 |
| 736.2156998 | 6.43245869 | 1.10826 | 0.003468782 | -0.928007503 | 955.3272459 | 7.63148885 | 1.34837 | 3.7037E-05  | 4.669363012  |
| 426.9024608 | 0.6736446  | 1.10715 | 0.004354076 | 0.407492165  | 959.3926936 | 8.40535702 | 1.08344 | 0.003220214 | 3.171892427  |
| 113.5317702 | 0.67066714 | 1.10652 | 0.003487725 | 0.318418418  | 961.2632401 | 8.21569583 | 1.34275 | 4.54769E-05 | 1.755868398  |
| 324.1265965 | 1.04490866 | 1.10609 | 0.004860251 | -1.04733728  | 961.2633423 | 7.23319927 | 1.37604 | 1.91108E-05 | 1.638427444  |

|             |            |         |             |              |             |            |         |             |              |
|-------------|------------|---------|-------------|--------------|-------------|------------|---------|-------------|--------------|
| 705.2880829 | 5.63527343 | 1.10604 | 0.003807964 | 0.58468858   | 965.3633021 | 7.38858147 | 1.47626 | 4.9893E-07  | -1.769376006 |
| 551.2003054 | 8.38729879 | 1.10538 | 0.003447153 | -0.823273106 | 969.2578085 | 1.05562042 | 1.04317 | 0.005448839 | 2.175344821  |
| 580.295683  | 8.03641759 | 1.10401 | 0.005225364 | 1.573850489  | 969.3912644 | 7.99625485 | 1.04244 | 0.004901259 | -1.138166558 |
| 935.3880687 | 8.5921446  | 1.10346 | 0.003681496 | -1.046308096 | 971.2740252 | 1.05323552 | 1.41841 | 5.18924E-06 | 1.851042354  |
| 319.0813502 | 6.21354048 | 1.10097 | 0.006161569 | -0.515603996 | 971.4858353 | 9.70055969 | 1.31617 | 7.59045E-05 | -4.977776956 |
| 328.9001436 | 0.67404216 | 1.10093 | 0.005786726 | -0.546319775 | 973.3472992 | 7.87344737 | 1.29169 | 0.000129883 | 1.888852748  |
| 400.9369134 | 0.72471142 | 1.09928 | 0.004364554 | -0.653726622 | 974.4293519 | 7.98179078 | 1.28614 | 0.000140996 | -2.086760192 |
| 765.8885314 | 8.12579652 | 1.09858 | 0.00371002  | -1.101287129 | 977.2816301 | 7.99173478 | 1.48397 | 3.28402E-07 | 1.732476467  |
| 1011.508691 | 9.39115341 | 1.09816 | 0.00730274  | 1.029839643  | 979.130981  | 5.1013078  | 1.4166  | 4.94161E-06 | -2.01323765  |
| 298.9896161 | 0.68936603 | 1.09701 | 0.00472771  | 0.44367878   | 985.3917539 | 7.55049918 | 1.29283 | 0.000116225 | -1.677066684 |
| 482.1016368 | 0.9600902  | 1.09604 | 0.004621153 | -1.182902857 | 987.3144759 | 7.73613682 | 1.0185  | 0.01180664  | -0.475290144 |
| 245.0765138 | 1.21008201 | 1.09603 | 0.003882454 | 0.528071008  | 992.3037077 | 6.25591195 | 1.26455 | 0.000234802 | 0.841434651  |
| 458.1123476 | 1.14786578 | 1.09521 | 0.003885036 | -1.490753002 | 993.2517725 | 5.97633019 | 1.12169 | 0.002053029 | 0.597254214  |
| 265.0176093 | 0.68339854 | 1.09495 | 0.003855659 | 0.231502017  | 995.3405199 | 7.8770833  | 1.07722 | 0.00323888  | 1.044281012  |
| 1018.005126 | 7.81109548 | 1.09447 | 0.004345764 | 0.945508247  | 997.3564131 | 7.93279343 | 1.09395 | 0.00407165  | 1.290287574  |
| 289.0882037 | 1.04054906 | 1.09327 | 0.004322567 | -1.530703977 | 999.441364  | 7.97928063 | 1.40594 | 6.45871E-06 | -2.28934875  |
| 358.2697844 | 7.99420664 | 1.09324 | 0.005130705 | -0.731839471 | 1001.295006 | 8.33342826 | 1.06356 | 0.004091414 | -0.761147324 |
| 557.2345491 | 4.03005458 | 1.09144 | 0.004330484 | 1.708660025  | 1003.328737 | 5.63262164 | 1.28153 | 0.000178313 | 1.647643342  |
| 744.2426161 | 6.24754176 | 1.09137 | 0.00423812  | -0.744665797 | 1013.350684 | 7.99629524 | 1.03051 | 0.0073201   | 1.641607917  |
| 402.1561039 | 1.04035957 | 1.09135 | 0.00564616  | 1.397241471  | 1017.390885 | 8.4722412  | 1.15498 | 0.001321227 | 0.795040733  |
| 245.1857029 | 5.88518169 | 1.09046 | 0.005120863 | -1.26882617  | 1023.369986 | 8.33671292 | 1.22306 | 0.000412158 | -0.97773247  |
| 359.2280612 | 4.52282533 | 1.09006 | 0.004085304 | -0.885424678 | 1035.334975 | 7.36897123 | 1.58776 | 1.58784E-10 | -2.458471258 |
| 907.4347589 | 7.98989146 | 1.08981 | 0.005119021 | -0.71442944  | 1038.020376 | 1.40851723 | 1.38542 | 1.79441E-05 | 1.929569418  |
| 538.1967658 | 6.55774059 | 1.08945 | 0.00472744  | 1.590470537  | 1039.294392 | 7.65782696 | 1.44168 | 2.5769E-06  | 3.068977616  |
| 282.0846691 | 0.76139193 | 1.08889 | 0.004275302 | -0.585253948 | 1041.345879 | 7.94751508 | 1.28633 | 0.000155103 | 1.815130986  |
| 528.2736016 | 9.5462377  | 1.08814 | 0.004578672 | -0.610318007 | 1049.378804 | 8.87553904 | 1.23673 | 0.00032544  | -1.106236375 |
| 472.3103523 | 7.6012706  | 1.08795 | 0.00430452  | -1.030135885 | 1053.401149 | 5.77967145 | 1.49797 | 1.646E-07   | -1.581627824 |
| 912.4416493 | 8.01592808 | 1.08575 | 0.004273149 | -0.792660546 | 1054.316959 | 6.23454919 | 1.29758 | 0.000102235 | -0.529154139 |
| 817.9890539 | 6.43273434 | 1.08494 | 0.004518606 | -0.924194589 | 1061.45806  | 7.55044326 | 1.22281 | 0.000417609 | -1.585990836 |
| 610.2708112 | 7.06328052 | 1.08488 | 0.004551294 | -0.754483908 | 1063.473895 | 7.61118337 | 1.30452 | 9.12085E-05 | -1.181991214 |
| 310.0715436 | 7.90716255 | 1.08221 | 0.007348075 | -0.371846724 | 1065.347244 | 7.59899463 | 1.40109 | 8.06215E-06 | -1.34958535  |
| 600.1617734 | 7.90083133 | 1.08157 | 0.007867137 | -0.364955913 | 1067.36113  | 7.37212466 | 1.07895 | 0.003217246 | -0.659144322 |
| 333.094694  | 4.41080398 | 1.08139 | 0.005535387 | 1.826082367  | 1077.417782 | 8.89379084 | 1.28447 | 0.000151246 | -1.095127527 |
| 493.1933903 | 5.33637024 | 1.08021 | 0.005159192 | 1.027392584  | 1079.397006 | 7.95552412 | 1.31462 | 8.63913E-05 | -1.139202567 |
| 502.2639715 | 5.99180491 | 1.0795  | 0.004616663 | -0.739678754 | 1085.262403 | 5.14916677 | 1.42586 | 3.85156E-06 | 0.771696564  |
| 651.1165738 | 3.64909994 | 1.07929 | 0.006289175 | -0.830635786 | 1087.332307 | 8.34233961 | 1.19518 | 0.000661237 | 1.301531566  |
| 326.1291283 | 4.5862622  | 1.07906 | 0.005875922 | -0.577142545 | 1091.362002 | 7.68525935 | 1.25296 | 0.000375972 | -0.661189589 |
| 983.3328582 | 7.38026531 | 1.07771 | 0.004674285 | -0.391166506 | 1099.422229 | 7.88615621 | 1.18216 | 0.000841006 | -1.173023988 |



|             |            |         |             |              |
|-------------|------------|---------|-------------|--------------|
| 334.8679708 | 0.70094867 | 1.07706 | 0.006186935 | -0.608566879 |
| 458.2755772 | 5.99548947 | 1.07227 | 0.004932802 | -1.055385516 |
| 369.0820446 | 7.67706315 | 1.07063 | 0.013728511 | -0.217879664 |
| 521.2019126 | 5.83201367 | 1.06972 | 0.00517857  | -1.768898674 |
| 295.1361046 | 4.81110343 | 1.0674  | 0.007474813 | 0.558385116  |
| 274.9461126 | 0.67255041 | 1.06696 | 0.005670336 | -0.905067808 |
| 635.4130683 | 14.0362125 | 1.06484 | 0.006025976 | -0.182185389 |
| 495.1867164 | 6.05336337 | 1.06479 | 0.005432611 | -0.425121404 |
| 312.1291822 | 2.90214722 | 1.06413 | 0.005925851 | 2.672589883  |
| 115.0753597 | 4.40469413 | 1.06226 | 0.006861196 | 1.956305628  |
| 351.1661843 | 4.84012224 | 1.0595  | 0.008181207 | 0.647865399  |
| 981.9918332 | 8.76091646 | 1.05917 | 0.005689307 | -1.355170391 |
| 696.2760895 | 5.57968765 | 1.05895 | 0.005689708 | 0.615649587  |
| 539.1740068 | 6.19374491 | 1.05889 | 0.005682127 | 0.434559534  |
| 435.1290148 | 7.89852175 | 1.05845 | 0.008357204 | -0.553841549 |
| 412.1466961 | 4.28442463 | 1.05819 | 0.005722184 | 0.471763751  |
| 245.0723205 | 1.03264987 | 1.05611 | 0.00843515  | -0.740484096 |
| 294.1045824 | 6.00245182 | 1.05561 | 0.007525472 | -0.528244649 |
| 728.3980229 | 9.20428681 | 1.05545 | 0.007452376 | -0.523714781 |
| 627.1929597 | 6.23178529 | 1.0528  | 0.006352479 | -0.781698038 |
| 328.0999435 | 8.05187801 | 1.05203 | 0.006318038 | -0.478068159 |
| 177.0544172 | 7.67812605 | 1.05189 | 0.014421409 | -0.203893889 |
| 434.1913953 | 1.04089562 | 1.05133 | 0.01063683  | 1.910936087  |
| 293.1233289 | 8.14163177 | 1.04895 | 0.010264343 | -0.386931796 |
| 337.5922333 | 8.89335069 | 1.0484  | 0.010247791 | -0.588193551 |
| 448.1691557 | 1.04863058 | 1.04834 | 0.009473702 | 0.993827811  |
| 602.5824768 | 6.72107468 | 1.04742 | 0.007906193 | 1.197874864  |
| 473.1077568 | 8.7045124  | 1.04712 | 0.006771842 | -0.497894351 |
| 158.1537063 | 10.6332997 | 1.04676 | 0.010155495 | -0.188028321 |
| 714.2069532 | 5.74149455 | 1.04636 | 0.006455919 | -1.496708085 |
| 639.226529  | 8.05585562 | 1.04606 | 0.006475701 | -0.426083222 |
| 191.0725558 | 6.80366155 | 1.0425  | 0.007376443 | -1.380883982 |
| 436.217743  | 8.64398713 | 1.04155 | 0.010416992 | 1.524534329  |
| 505.2435661 | 8.27028811 | 1.04122 | 0.00739098  | -3.804401459 |
| 359.1310796 | 7.80790061 | 1.03846 | 0.007096242 | 1.012446452  |
| 471.2610381 | 0.99618157 | 1.03629 | 0.007414112 | 1.095779379  |
| 398.1661822 | 6.4611819  | 1.03547 | 0.007656247 | 1.791462747  |
| 317.0802157 | 8.89417117 | 1.03473 | 0.012315132 | -0.55523207  |

|             |            |         |             |              |
|-------------|------------|---------|-------------|--------------|
| 477.1739178 | 6.05259896 | 1.03465 | 0.007292247 | -0.627365321 |
| 319.2034591 | 5.69424998 | 1.03449 | 0.010431285 | -2.044992419 |
| 445.2222612 | 7.81171944 | 1.03341 | 0.007892473 | -2.857803012 |
| 353.1684611 | 1.04408577 | 1.03287 | 0.007773992 | -0.733823887 |
| 936.5055496 | 7.88412193 | 1.03227 | 0.007836627 | -1.027858351 |
| 513.1968023 | 6.05251587 | 1.03186 | 0.007480048 | -0.405247156 |
| 665.1716691 | 7.23751415 | 1.03149 | 0.010200035 | 1.295128959  |
| 368.1913118 | 8.71083008 | 1.03009 | 0.007668623 | -1.546035142 |
| 511.201101  | 6.87695631 | 1.02873 | 0.007710473 | 1.064294477  |
| 403.1222819 | 6.46309548 | 1.02867 | 0.007915669 | 1.628872044  |
| 515.1241722 | 7.22227211 | 1.02798 | 0.016528667 | 1.42618817   |
| 410.926097  | 0.6794222  | 1.02763 | 0.008289381 | 0.645180414  |
| 300.2012325 | 4.71677626 | 1.02667 | 0.008201219 | -0.876755048 |
| 250.1774626 | 10.4536869 | 1.02495 | 0.010160973 | -0.414175859 |
| 766.3534768 | 9.2053345  | 1.02462 | 0.01686318  | -0.312013948 |
| 321.560525  | 7.67812605 | 1.02357 | 0.009905701 | -0.379177812 |
| 266.1038932 | 0.76478647 | 1.02315 | 0.008167331 | -0.880884017 |
| 707.8694226 | 6.86859025 | 1.0228  | 0.012885481 | 0.905575933  |
| 198.9400965 | 0.67798697 | 1.02264 | 0.014396633 | -0.312601443 |
| 525.2304152 | 8.99981643 | 1.01952 | 0.008636449 | -0.852112948 |
| 511.2288918 | 4.19344589 | 1.01806 | 0.008647638 | 0.834851659  |
| 305.0631401 | 1.66713528 | 1.0168  | 0.011136325 | 0.718587468  |
| 129.0234643 | 0.66639494 | 1.01464 | 0.010347524 | -0.573146335 |
| 483.1630914 | 4.33865307 | 1.01409 | 0.008903482 | -0.515672639 |
| 727.2444465 | 7.89631143 | 1.01179 | 0.013053326 | -0.627885808 |
| 401.167948  | 7.55663393 | 1.01174 | 0.010322811 | -0.650171452 |
| 333.1908761 | 8.15889178 | 1.0113  | 0.00921702  | 1.387378864  |
| 419.13435   | 7.89922525 | 1.01037 | 0.014367814 | -0.43321986  |
| 465.139671  | 6.21099053 | 1.0099  | 0.01403079  | -0.54704809  |
| 447.1348001 | 6.99283237 | 1.00975 | 0.009681774 | 1.273372304  |
| 423.1627189 | 9.31958034 | 1.00887 | 0.009908606 | 1.320105932  |
| 527.2386002 | 8.97332363 | 1.00883 | 0.014798805 | 1.280799186  |
| 257.0778048 | 4.40532483 | 1.00876 | 0.00931937  | 0.61416354   |
| 339.1075142 | 7.30262931 | 1.00745 | 0.011411161 | 0.640629215  |
| 284.1338418 | 1.66610922 | 1.00427 | 0.013609238 | 0.730870934  |
| 367.1868868 | 1.49893771 | 1.00408 | 0.010027017 | -0.441992931 |
| 316.0935425 | 1.00004794 | 1.00377 | 0.011668262 | 0.58317337   |

---

---

Note: M/Z refers to mass-to-charge ratio. RT refers to retention time, min. VIP refers to the variable importance in the projection of PLS-DA. Fold change (M/W) refers to the ratio of 'HAL' mean of normalization m/z value to 'AL' mean of normalization m/z value. The significant difference of m/z was screened by the criteria of VIP > 1 and p-value < 0.01.

**Table s2** The primers used for PCR confirmation of the genes involved in citrate synthesis, transport, and degradation or utilization

| Gene Name        | Description                       | Sequence (5'-3')           | Product size, bp | Sequence ID       |
|------------------|-----------------------------------|----------------------------|------------------|-------------------|
|                  |                                   | Forward primer             |                  |                   |
| <i>PEPC1</i>     |                                   | TGTTGGAAGAGGAGGTGGTC       | 951              | orange1.1g002089m |
| <i>PEPC2</i>     | phosphoenolpyruvate carboxylase   | ATGGCTGCTAGAAATTTGGAGAAG   | 783              | orange1.1g002112m |
| <i>PEPC3</i>     |                                   | TCTTCTTTCGCCTCTATGCCACTG   | 581              | orange1.1g001537m |
| <i>CS1</i>       | citrate synthase                  | GAGGCTTATGAGAAGGGAAT       | 756              | orange1.1g012107m |
| <i>CS2</i>       |                                   | ATGGCGCCAAGCGTAGAATCATCGT  | 1542             | orange1.1g010304m |
| <i>NAD-IDH1</i>  |                                   | GATCCCTCCCTTTCCTGAAG       | 917              | orange1.1g018224  |
| <i>NAD-IDH2</i>  | NAD-isocitrate dehydrogenase      | TCTCAACCACAAACCCCAAC       | 1062             | Ciclev10025889m   |
| <i>NAD-IDH3</i>  |                                   | CCCTACCGATCCTCAAACAA       | 1094             | orange1.1g017413  |
| <i>NADP-IDH1</i> |                                   | ATCCCATCGTTGAAATGGAC       | 975              | orange1.1g015012  |
| <i>NADP-IDH2</i> | NADP-isocitrate dehydrogenase     | AGGTTACCGTAGAAAGCGCT       | 919              | Ciclev10005058    |
| <i>NADP-IDH3</i> |                                   | GATGAAGTGCGGGTTAAGGA       | 797              | orange1.1g009041  |
| <i>GS1</i>       |                                   | ATGTCTCTTCTCAACGATCTCCTCAA | 1071             | orange1.1g013478m |
| <i>GS2</i>       | glutamine synthetase              | ATGTCTCTGCTCTCAGATCTCCTT   | 1071             | orange1.1g018391m |
| <i>GS3</i>       |                                   | ATGGCGCAGATTTTGGCACCTTCTA  | 1449             | orange1.1g018434m |
| <i>PEPCK1</i>    | phosphoenolpyruvate carboxykinase | CCAGAACACCGGATCAAAGT       | 794              | orange1.1g005865m |
| <i>PEPCK2</i>    |                                   | ATGGCAGCGAACGGTAACGGAGAGTT | 1995             | orange1.1g006486m |
| <i>FBPase1</i>   | fructose-1,6-bisphosphatase       | TCGGCTCTCTCCTTACCAAA       | 751              | orange1.1g015111m |
| <i>FBPase2</i>   |                                   | CCGTTGGATGGGTCTTCTAA       | 605              | orange1.1g019437m |
| <i>CsPH8</i>     | p-type proton pump                | CCGTGAAGGAATTGATTTGG       | 877              | Shi et al.(2015)  |
| <i>VHA-af</i>    | VHA assembly factor               | ATGGTATCCGAATCCGACAA       | 633              | orange1.1g028366m |
| <i>VHA-A</i>     | V-type ATPase A subunit           | AACACACAAGCCTCTCTCGG       | 1066             | Ciclev10030969m   |
| <i>VHA-B</i>     | V-type ATPase B subunit           | GCTGGTTTAGTCAAGCGATT       | 846              | orange1.1g011329m |
| <i>VHA-C</i>     | V-type ATPase C subunit           | TACTGGGTGGTGTCTCTTCC       | 557              | Ciclev10015638m   |

|                |                           |                         |                         |      |                   |
|----------------|---------------------------|-------------------------|-------------------------|------|-------------------|
| <i>VHA-D</i>   | V-type ATPase D subunit   | GGTTCCCACAGTGACAATGC    | TTCAAGCGAAAGAAATCCTC    | 585  | Ciclev10009240m   |
| <i>VHA-E1</i>  | V-type ATPase E subunit   | CGGTTTATCCGCCAAGAA      | CCACCACGACACCTCCTG      | 535  | orange1.1g027450m |
| <i>VHA-E2</i>  |                           | TGAGGTTTCATTCCGCCAGG    | CAACTCCACCCGAGCAAG      | 531  | Cs6g10330.1       |
| <i>VHA-F1</i>  | V-type ATPase F subunit   | ACTGGATTTTTGCTGGCTGG    | GGTCATACGGATGGTCCTTAGA  | 247  | Ciclev10002833m   |
| <i>VHA-F2</i>  |                           | ATGGCTAATAGACCTCAAATACG | TCAGCGCCTGTCAGATGC      | 468  | Ciclev10022651m   |
| <i>VHA-G</i>   | V-type ATPase G subunit   | ATGGCATCTAATAGGGGTC     | TTAATTCTTCACAGTTGTAACA  | 333  | Cs6g11650.2       |
| <i>VHA-H1</i>  | V-type ATPase H subunit   | ATGCACAAAGATCCCCTATTC   | TCAGGCCTGCAAAAAGCTCGT   | 312  | orange1.1g034108m |
| <i>VHA-H2</i>  |                           | CAGTGGAGTACTTGGCAACTA   | TCCTTCAAACCTTCTTCCAGTTG | 250  | Cs7g14520.1       |
| <i>VHA-a1</i>  | V-type ATPase a subunit   | CAGGTAAAGCGATGCGGA      | AGGCGATTCCATAGAGTCCA    | 963  | orange1.1g003454m |
| <i>VHA-a2</i>  |                           | TCATCCCTATTGAATCCGCT    | AAAATAACATAACGACCGCC    | 1338 | Cs8g08330.1       |
| <i>VHA-c1</i>  | V-type ATPase c subunit   | CACCGTTCTTCGGCTTCT      | TTATGTTTTCGTGCATGA      | 425  | Cs8g07570.1       |
| <i>VHA-c2</i>  |                           | ATGTCATCGACTTTCTCCGGC   | TTATTCTGCCCAGATTGGCCT   | 498  | orange1.1g031149m |
| <i>VHA-c3</i>  |                           | GTATGGGACGGCGAAGAGTG    | CAAGCGAGACCCGAAGACAA    | 213  | Cs1g25080.1       |
| <i>VHA-c4</i>  |                           | GTGGCGATGAAACCGCTC      | ACCTGACACCAGCATCACC     | 351  | Ciclev10002781m   |
| <i>VHA-c''</i> | V-type ATPase c'' subunit | ATGTCGGGCTCCGTAATGTTG   | TTACACTGGTTTTGCAGGCCAT  | 549  | Cs4g20460.1       |
| <i>VHA-d</i>   | V-type ATPase d subunit   | ACAATTTGTGCCAGTGCGA     | TACGACGATCATCTCGGGTG    | 615  | orange1.1g018709m |
| <i>VHA-e</i>   | V-type ATPase e subunit   | ATGGGGTTTTTGGTGACA      | TCACTCCTCTTCACTCAG      | 213  | Ciclev10010112m   |
| <i>VHP1</i>    | V-type Ppase              | CAGTGGTTCATCGTCTCCCG    | GCCTCAAAAAGTCCCTCCCA    | 593  | Ciclev10024946m   |
| <i>VHP2</i>    |                           | CAGCCCTGTCCAAGATGTGCG   | GGACCAAGAGTTCTGGCGTG    | 840  | Ciclev10007524m   |
| <i>VHP3</i>    |                           | TGCCGTTGCTGCTTATGC      | TGGGTGAGGCATCAGTGG      | 436  | orange1.1g040141m |
| <i>VHP4</i>    |                           | GTTTCGCAATACAACCCCTC    | GCTGCTGGCTCATCTCTACA    | 1247 | orange1.1g003697m |

**Table s3** The mass spectrometric parameters for the positive and negative ion modes

|                         | Positive ion mode | Negative ion mode |
|-------------------------|-------------------|-------------------|
| Capillary voltage       | 4 kV              | 3.5 kV            |
| Cone voltage            | 35 kV             | 5 0kV             |
| Iron source temperature | 100°C             | 100°C             |
| Desolvation temperature | 350 °C            | 300 °C            |
| Reverse cone gas flow   | 50 L/h            | 50 L/h            |
| Desolvation gas flow    | 600 L/h           | 700 L/h           |
| Extraction cone voltage | 4 V               | 4 V               |
